# Supplementary material
Source: PubMed Central journal article supplement (PMC2900686)
Supplement: 1003391107_sfig01.pdf [file 1003391107_sfig01.pdf]

# Telomere and Centromere location

Chromosome I

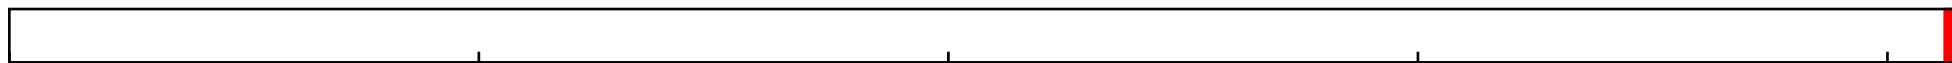

## Transposable elements / 50 kb

37

0

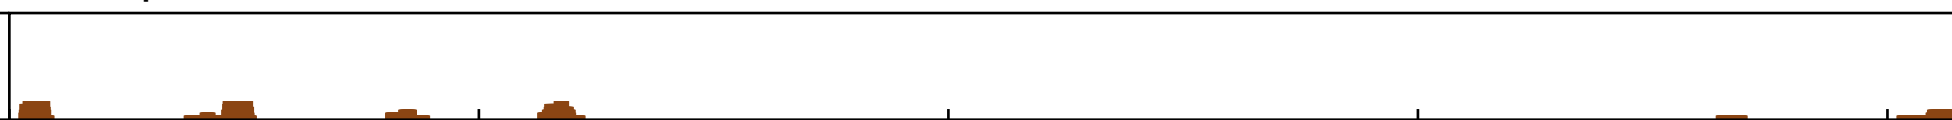

## tRNA genes / 50 kb

7

0

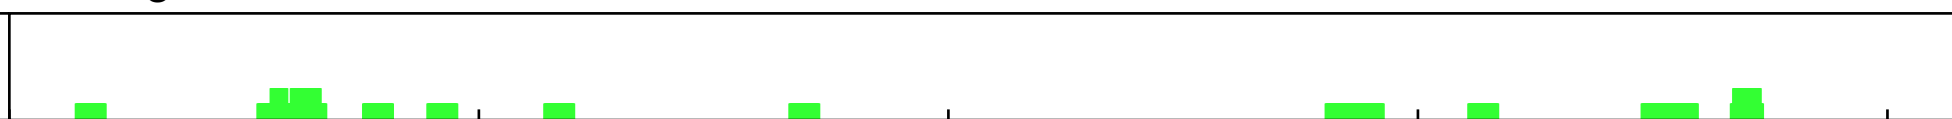

## Recombination rate

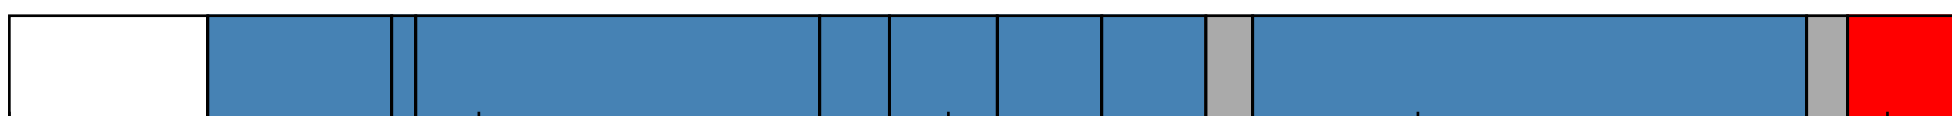

## Genes / 50 kb

32

0

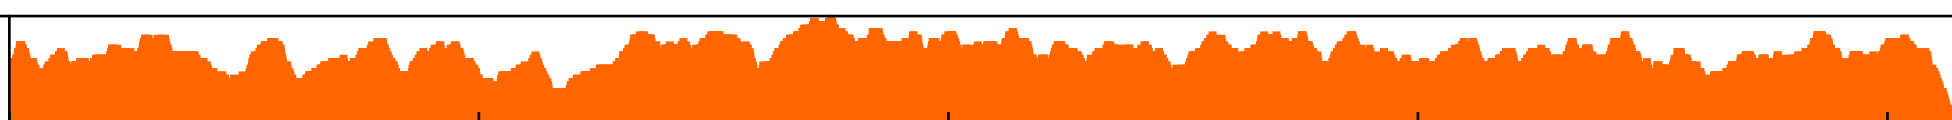

## Orphan genes / genes / 50 kb

1

0

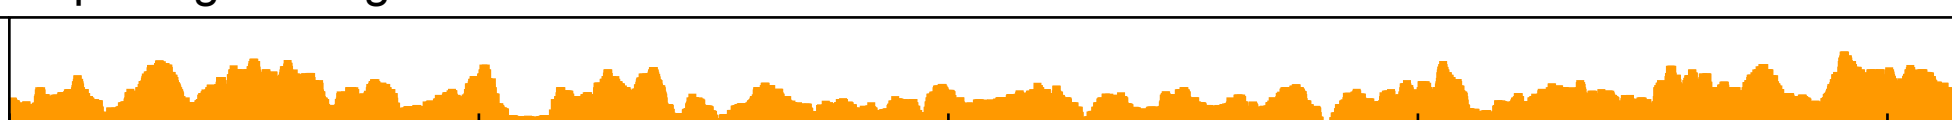

## Orthologous genes / genes / 50 kb

1

0

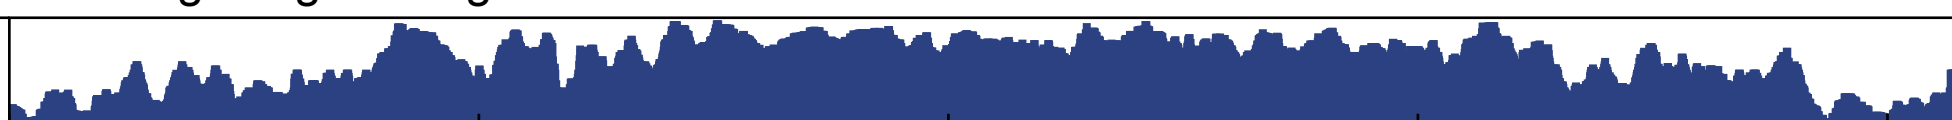

## Paralogous genes / genes / 50 kb

1

0

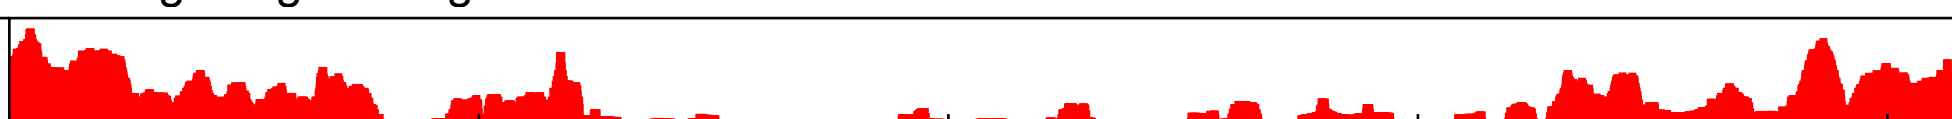

## Paralogs 1/dS

1

0

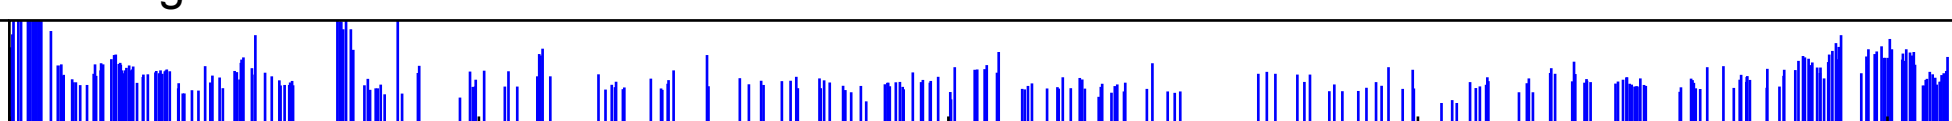

## FISH synteny blocks

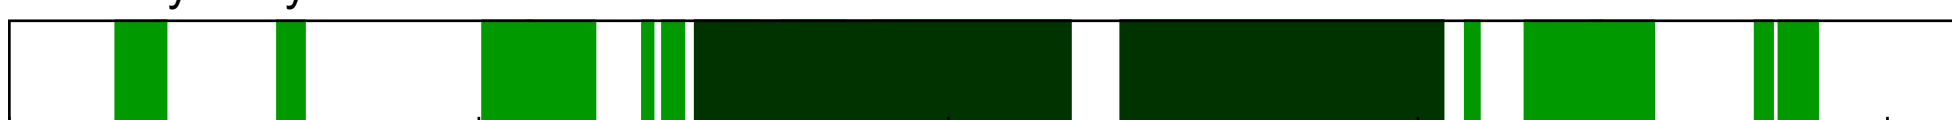

0

1

2

3

4

Telomere and Centromere location

Chromosome II

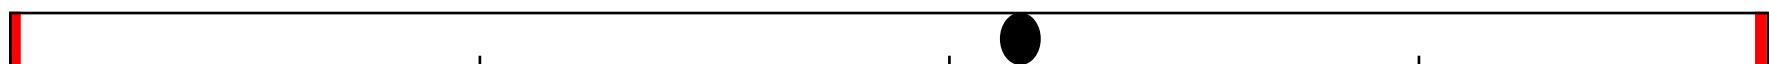

Transposable elements / 50 kb

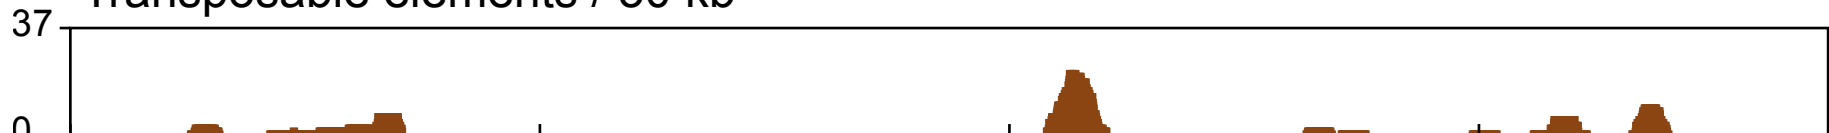

tRNA genes / 50 kb

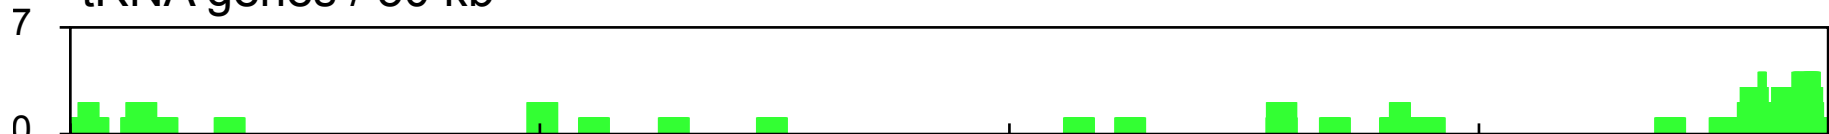

Recombination rate

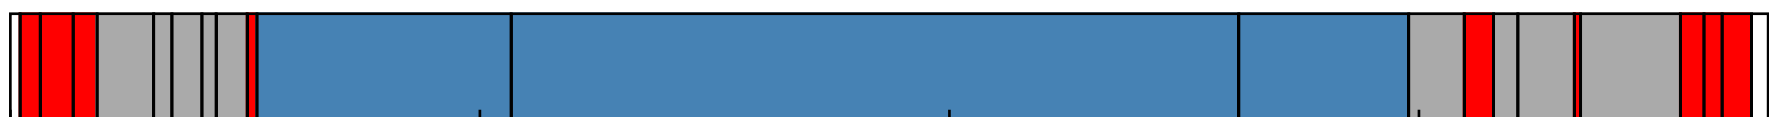

Genes / 50 kb

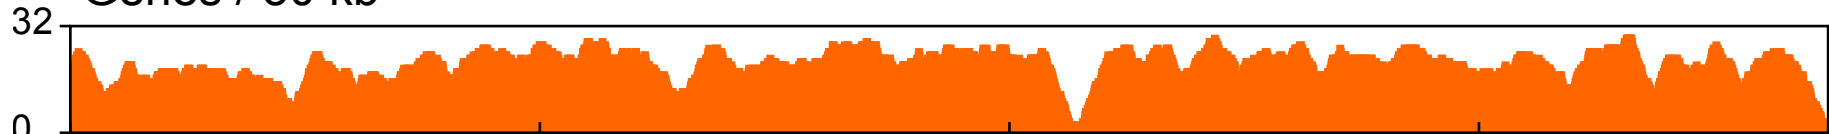

Orphan genes / genes / 50 kb

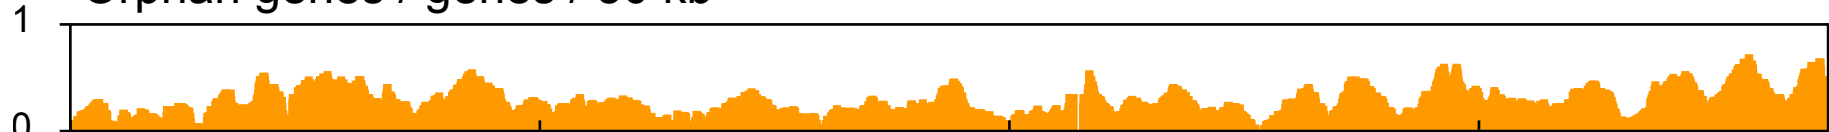

Orthologous genes / genes / 50 kb

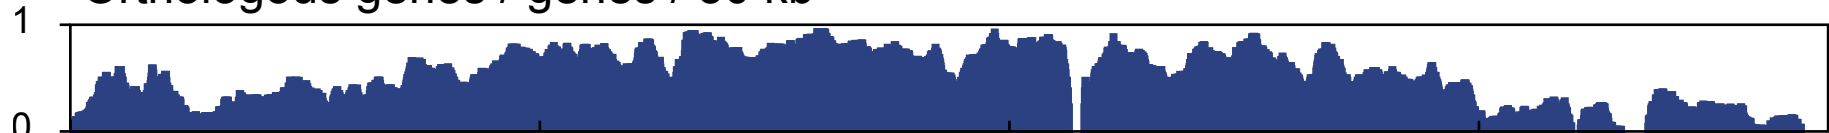

Paralogous genes / genes / 50 kb

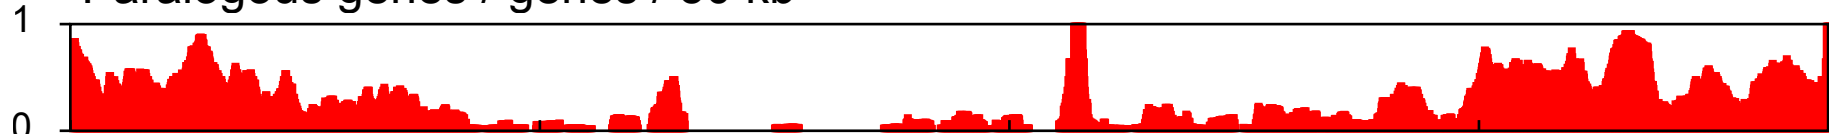

Paralogs 1/dS

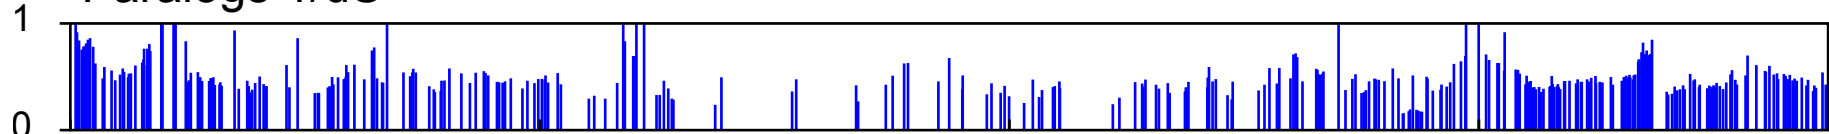

FISH synteny blocks

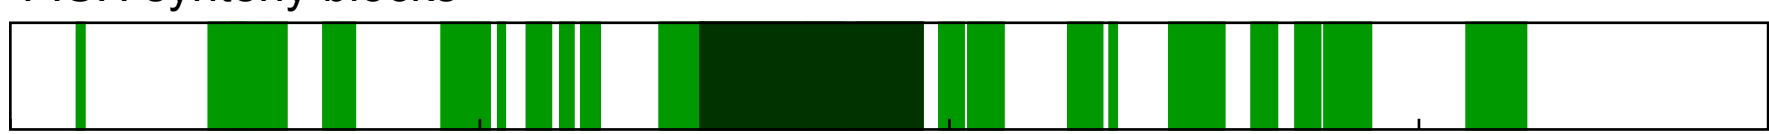

0

1

2

3

Telomere and Centromere location

Chromosome III

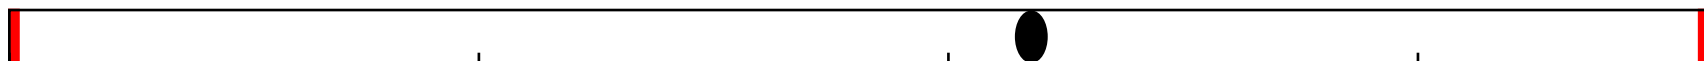

Transposable elements / 50 kb

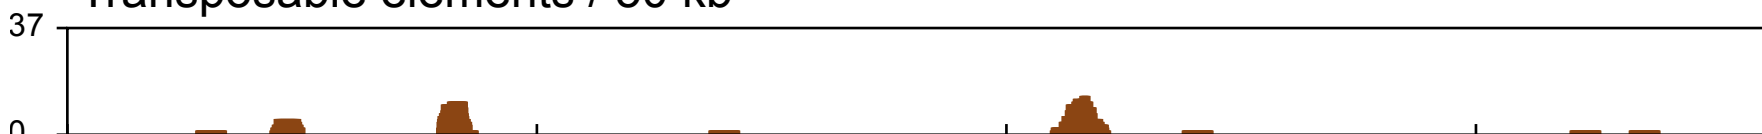

tRNA genes / 50 kb

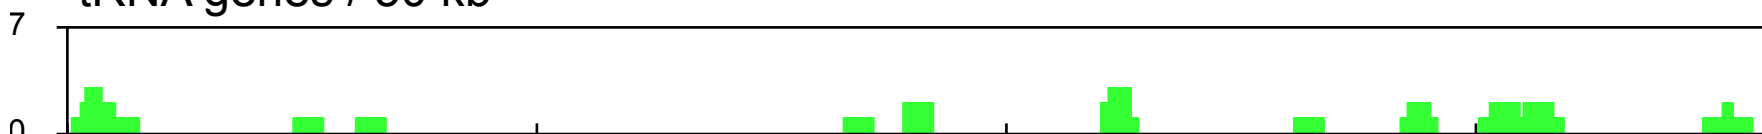

Recombination rate

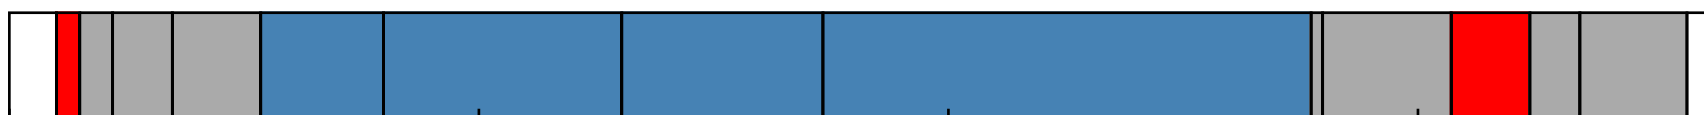

Genes / 50 kb

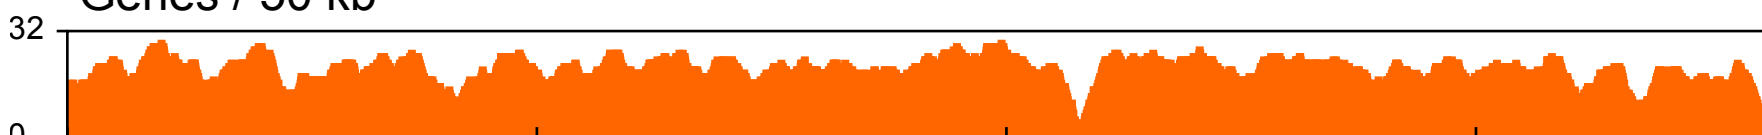

Orphan genes / genes / 50 kb

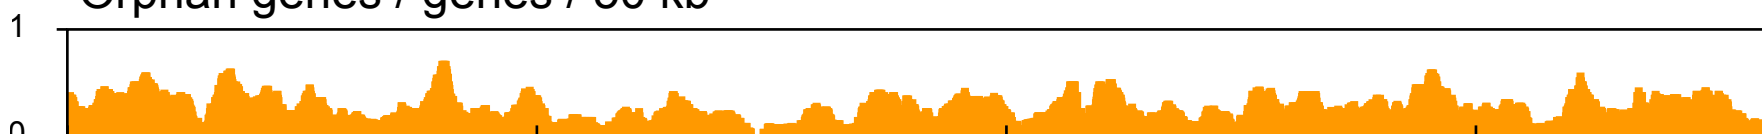

Orthologous genes / genes / 50 kb

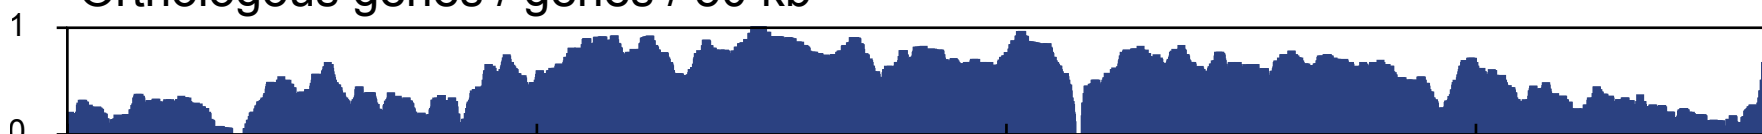

Paralogous genes / genes / 50 kb

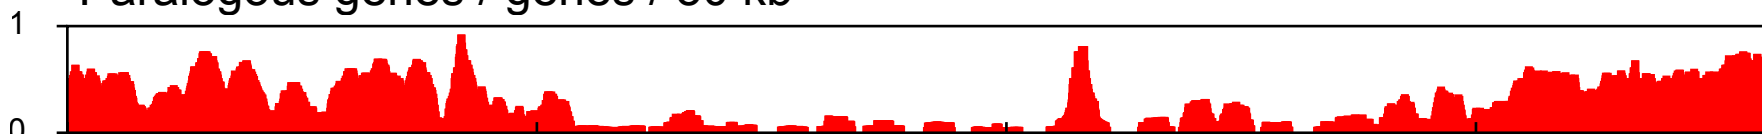

Paralogs 1/dS

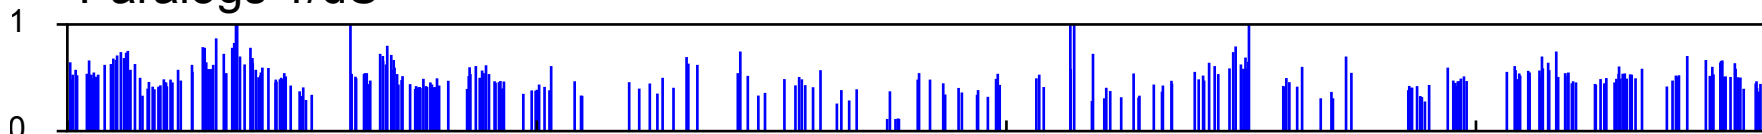

FISH synteny blocks

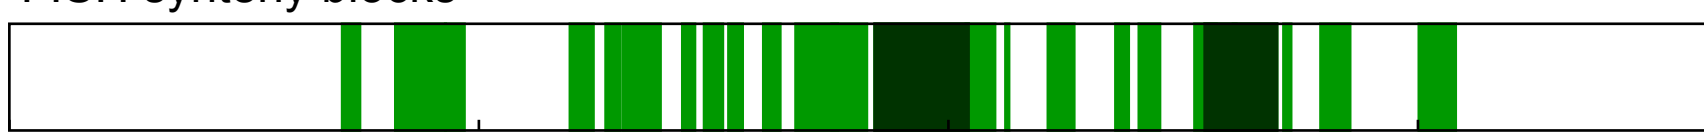

0

1

2

3

# Telomere and Centromere location

Chromosome IV

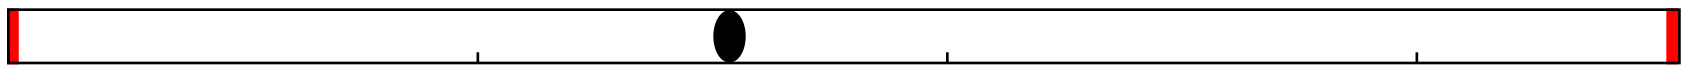

## Transposable elements / 50 kb

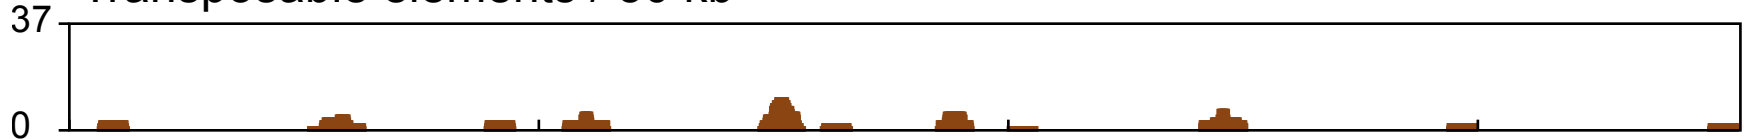

## tRNA genes / 50 kb

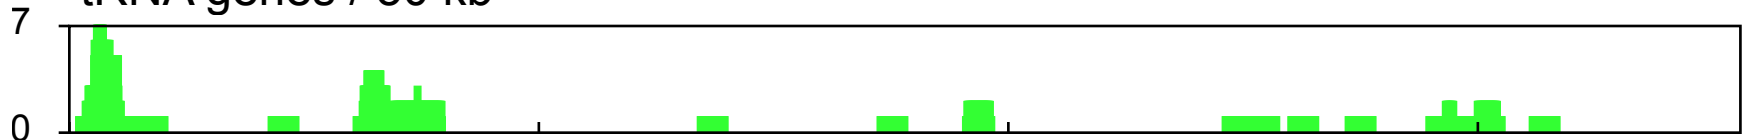

## Recombination rate

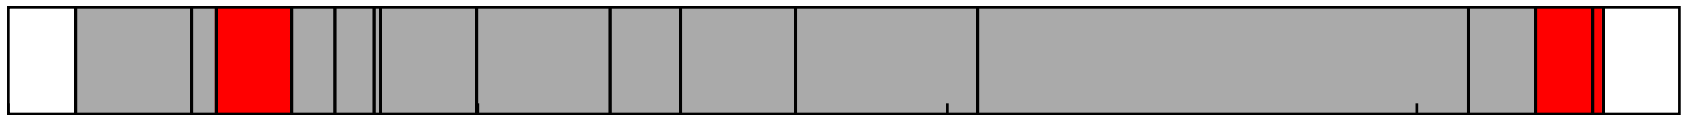

## Genes / 50 kb

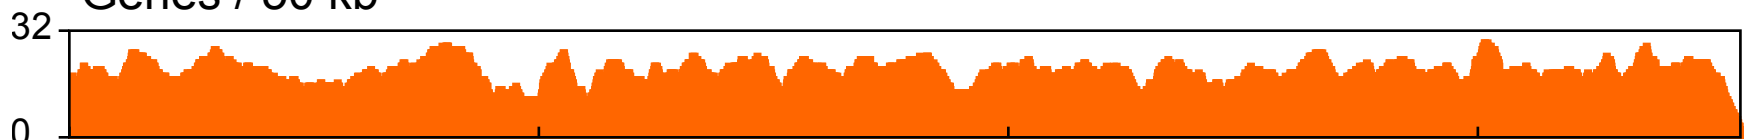

## Orphan genes / genes / 50 kb

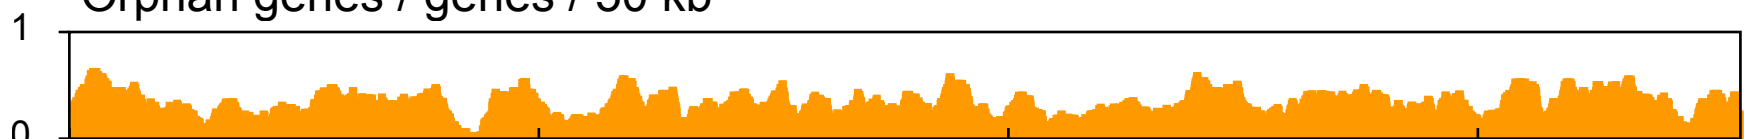

## Orthologous genes / genes / 50 kb

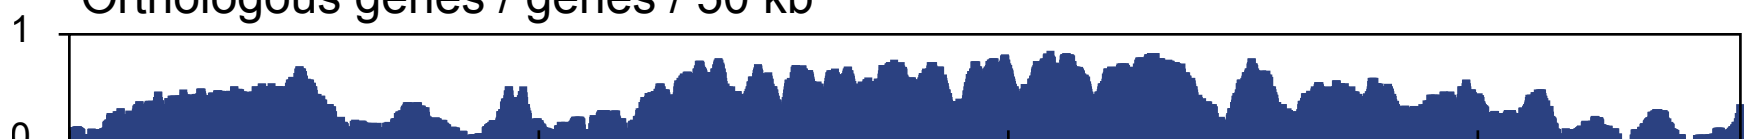

## Paralogous genes / genes / 50 kb

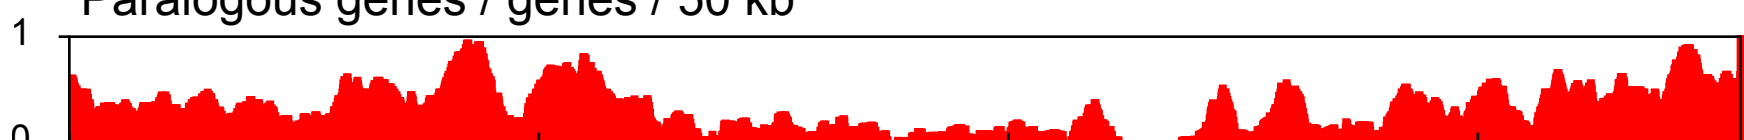

## Paralogs 1/dS

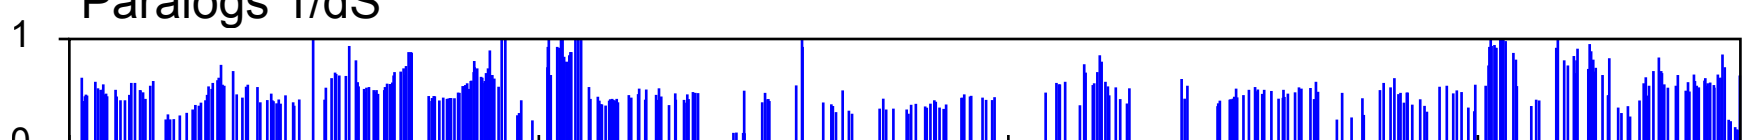

## FISH synteny blocks

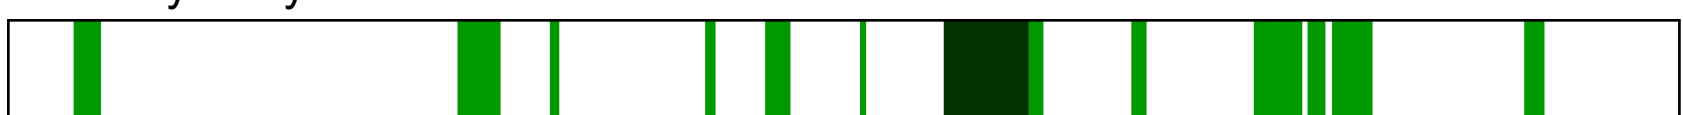

0

1

2

3

# Telomere and Centromere location

# Chromosome V

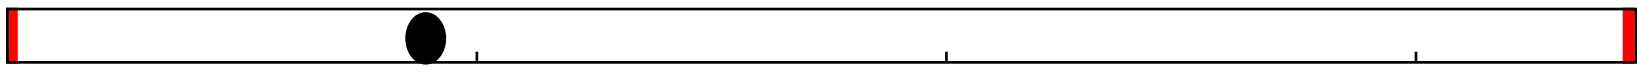

## Transposable elements / 50 kb

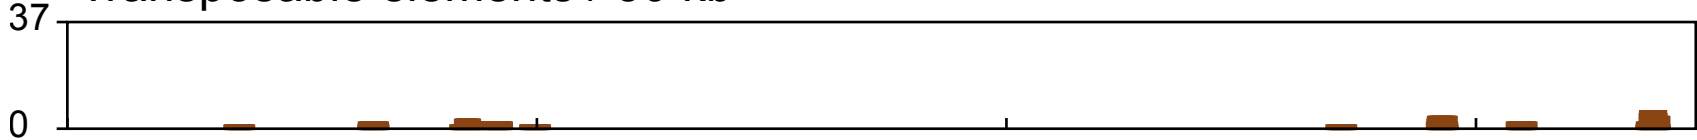

## tRNA genes / 50 kb

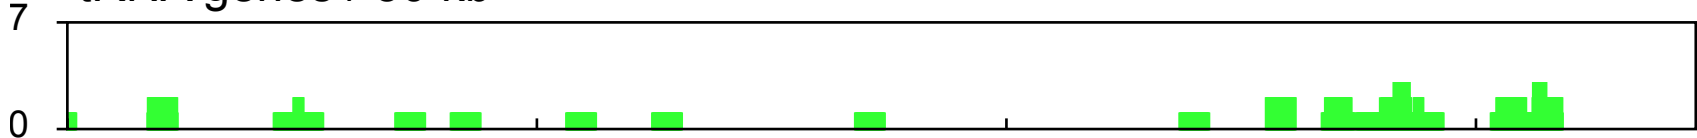

## Recombination rate

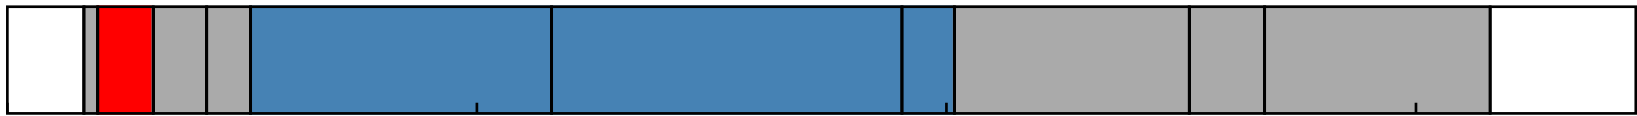

## Genes / 50 kb

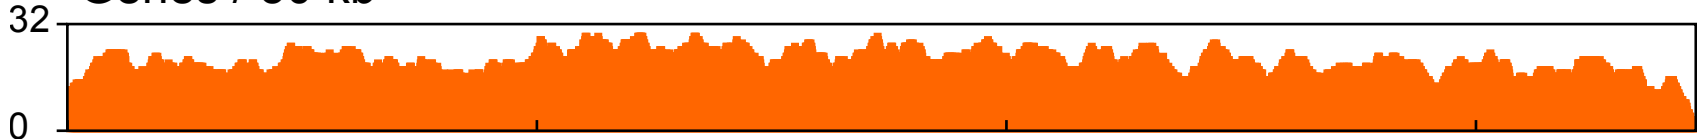

## Orphan genes / genes / 50 kb

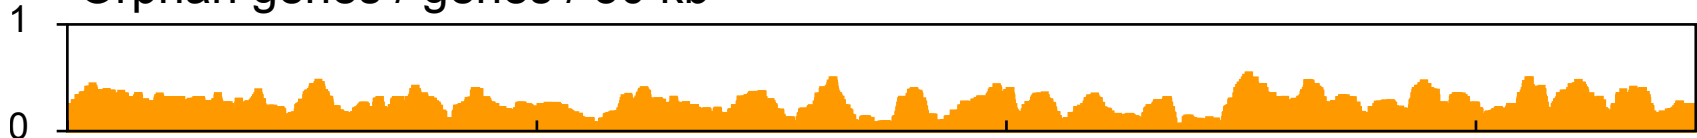

## Orthologous genes / genes / 50 kb

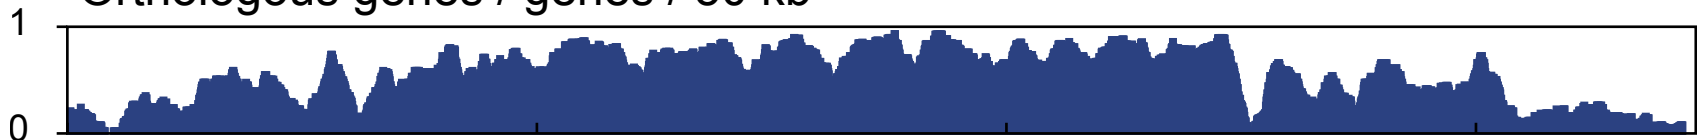

## Paralogous genes / genes / 50 kb

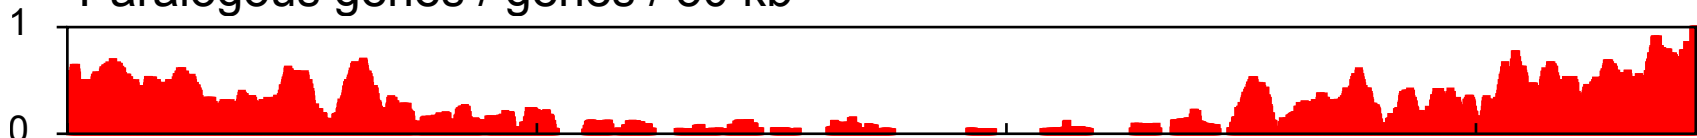

## Paralogs 1/dS

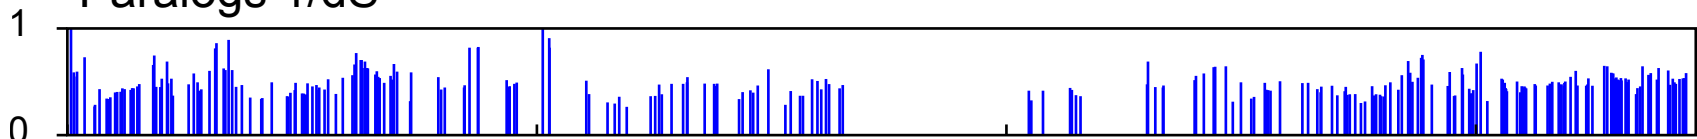

## FISH synteny blocks

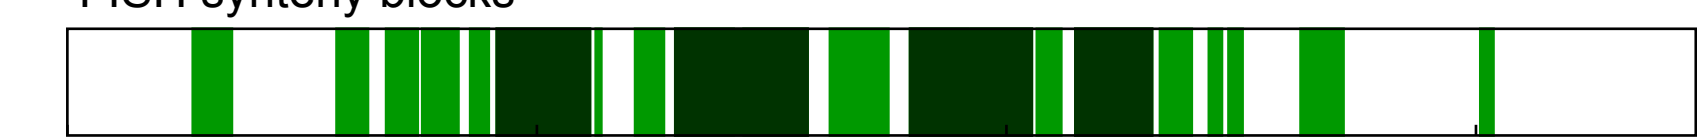

0 1 2 3

# Telomere and Centromere

location

Chromosome VI

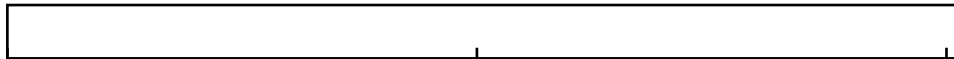

37  
Transposable elements / 50 kb

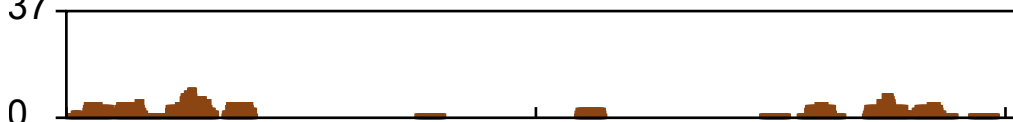

7  
tRNA genes / 50 kb

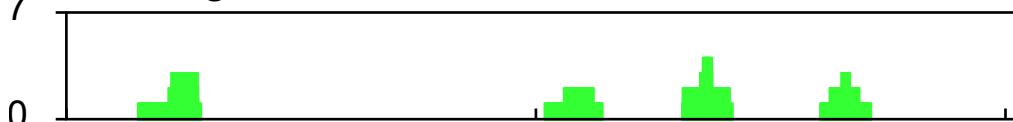

Recombination rate

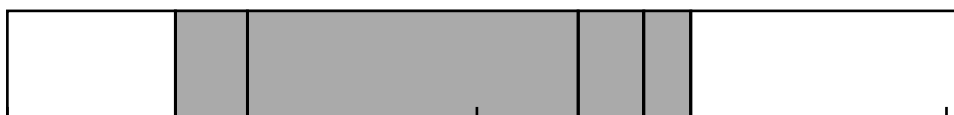

32  
Genes / 50 kb

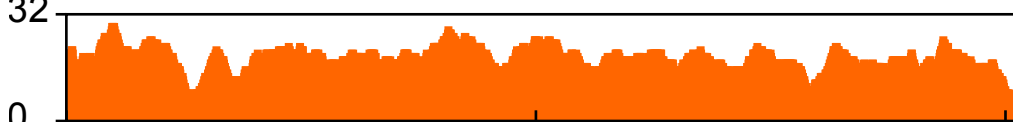

1  
Orphan genes / genes / 50 kb

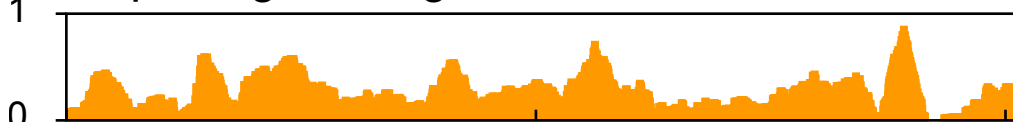

1  
Orthologous genes / genes / 50 kb

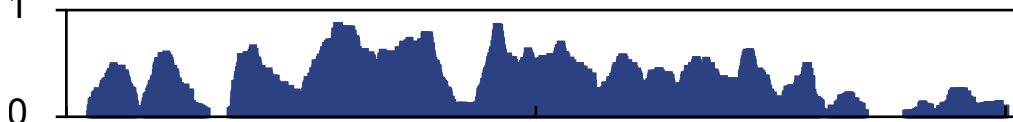

1  
Paralogous genes / genes / 50 kb

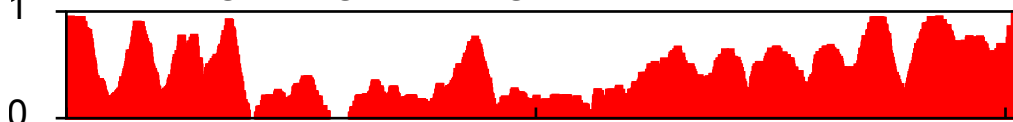

1  
Paralogs 1/dS

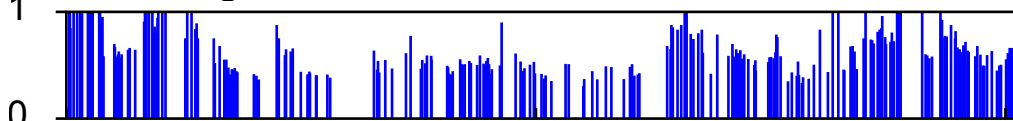

FISH synteny blocks

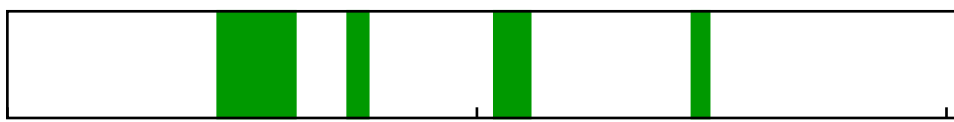

0

1

2

Telomere and Centromere location

Chromosome VII

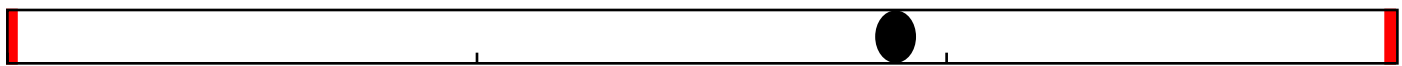

Transposable elements / 50 kb

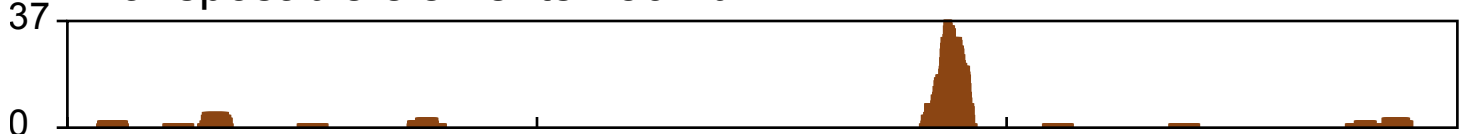

tRNA genes / 50 kb

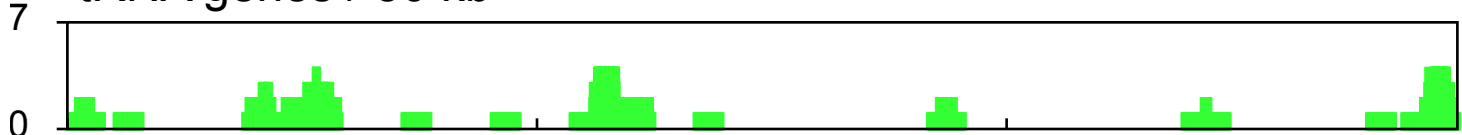

Recombination rate

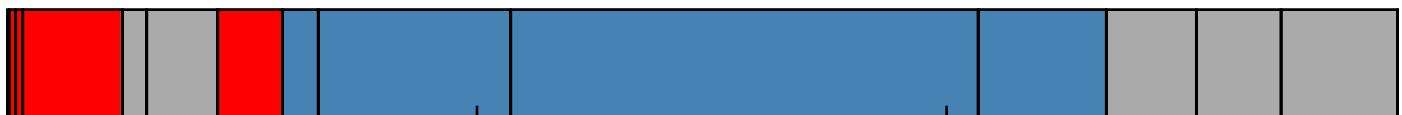

Genes / 50 kb

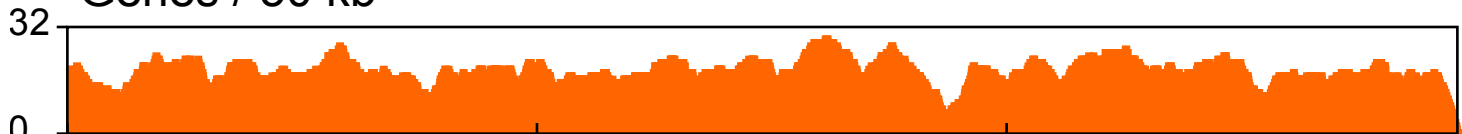

Orphan genes / genes / 50 kb

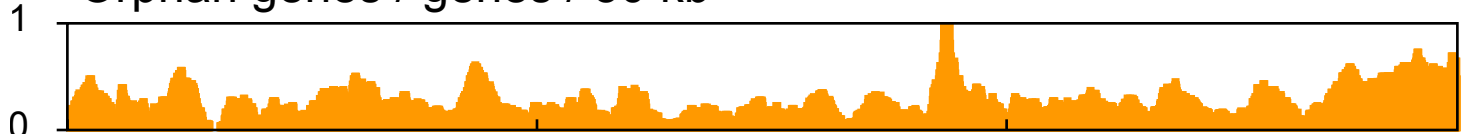

Orthologous genes / genes / 50 kb

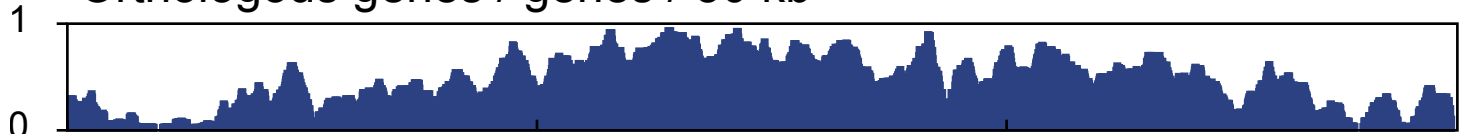

Paralogous genes / genes / 50 kb

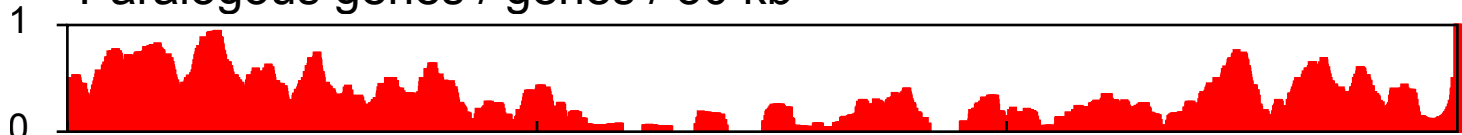

Paralogs 1/dS

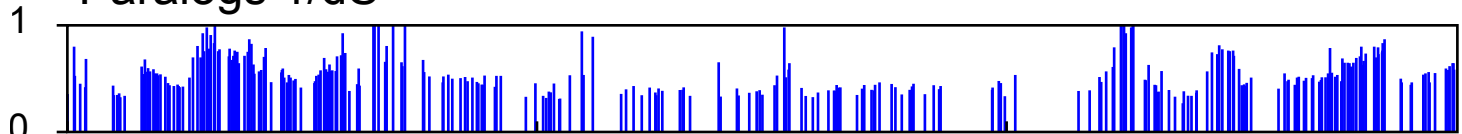

FISH synteny blocks

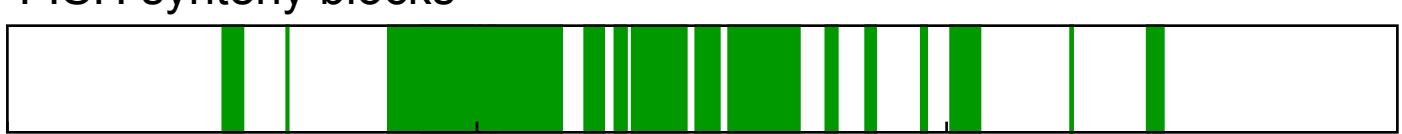

0 1 2

# Telomere and Centromere location

# Chromosome VIII

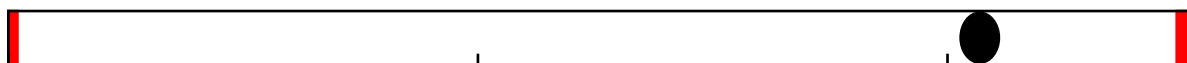

## Transposable elements / 50 kb

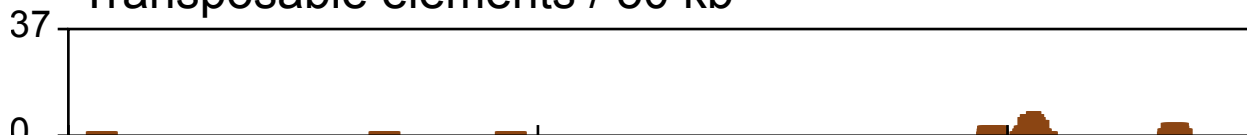

## tRNA genes / 50 kb

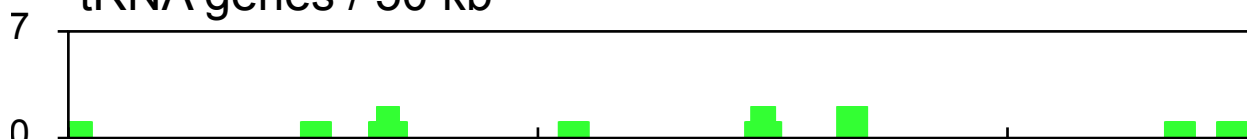

## Recombination rate

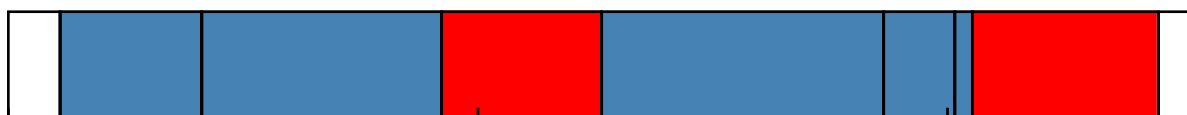

## Genes / 50 kb

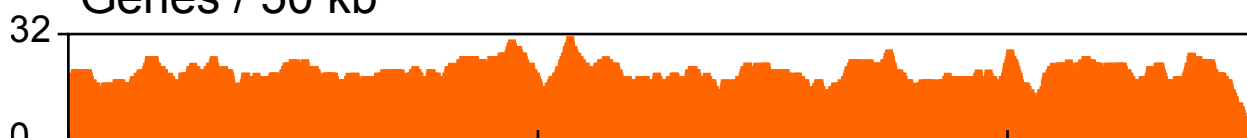

## Orphan genes / genes / 50 kb

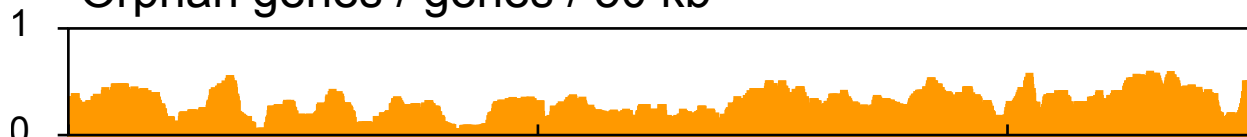

## Orthologous genes / genes / 50 kb

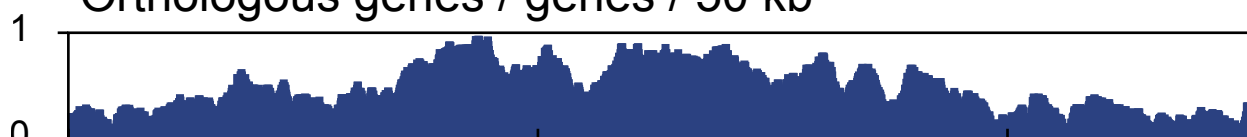

## Paralogous genes / genes / 50 kb

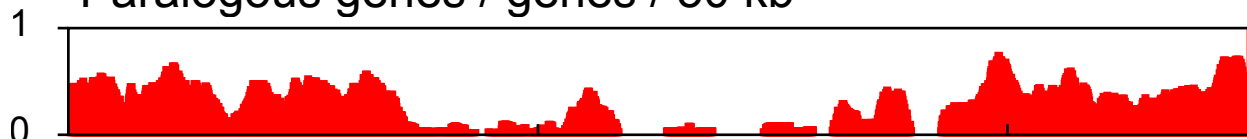

## Paralogs 1/dS

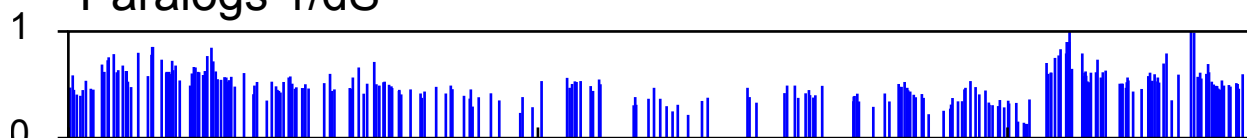

## FISH synteny blocks

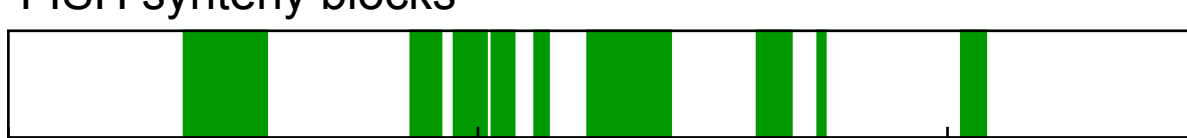

0 1 2



Telomere and Centromere location      Chromosome IX

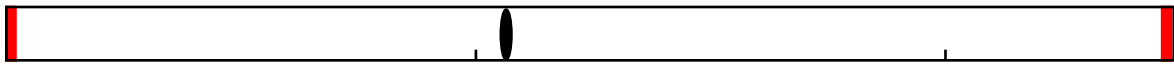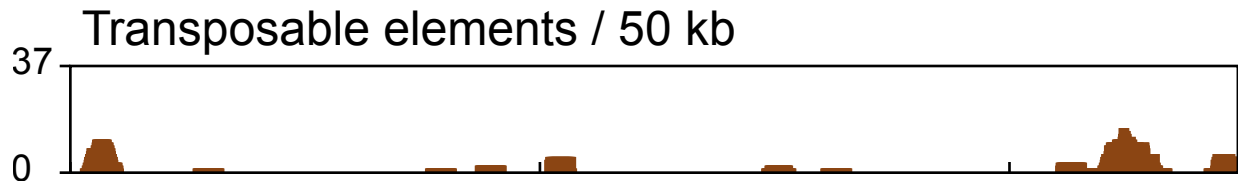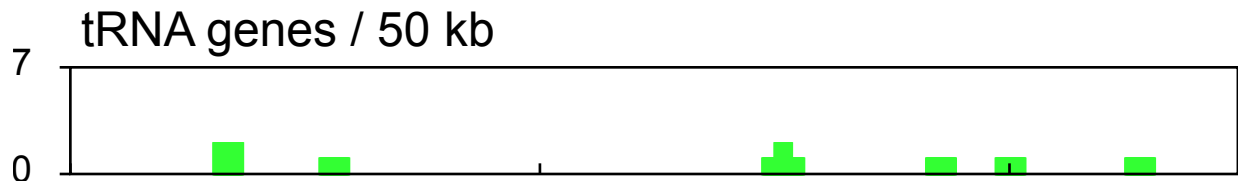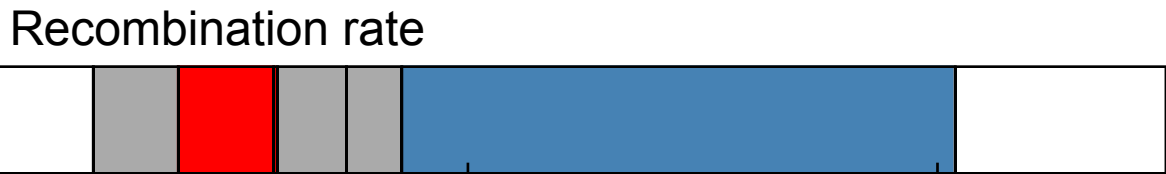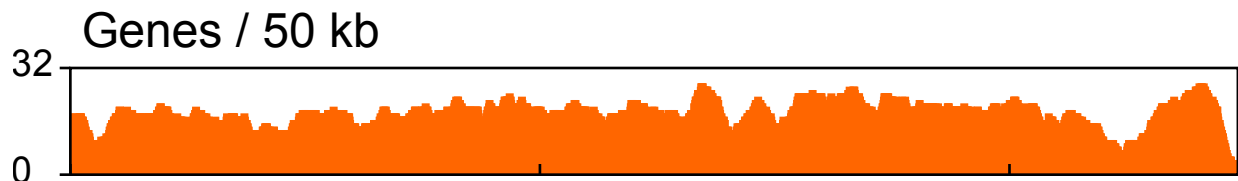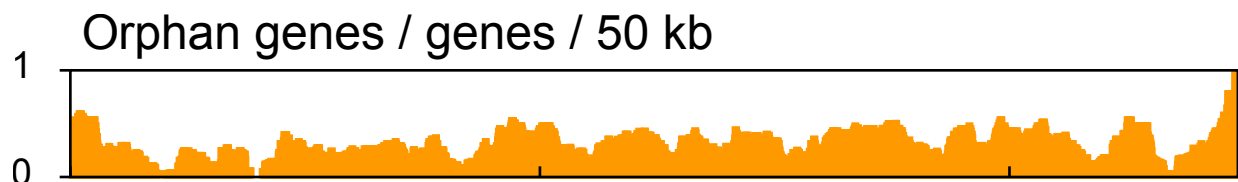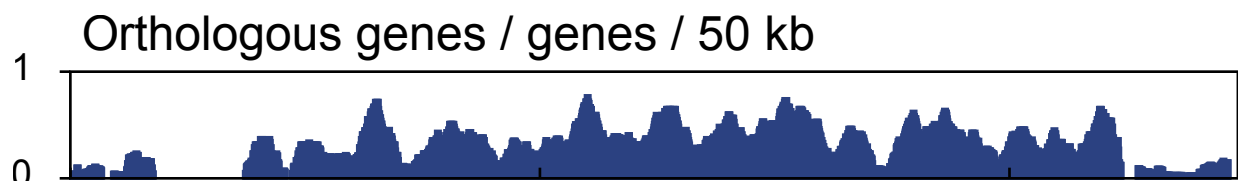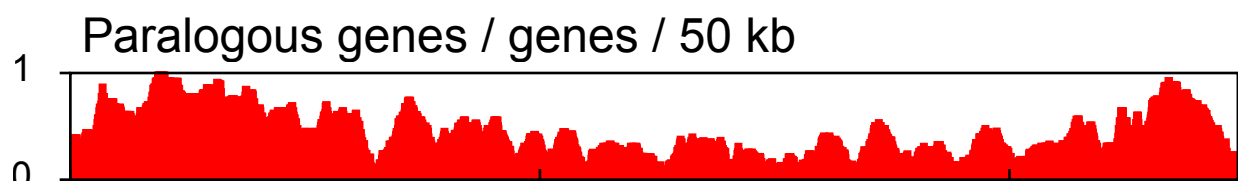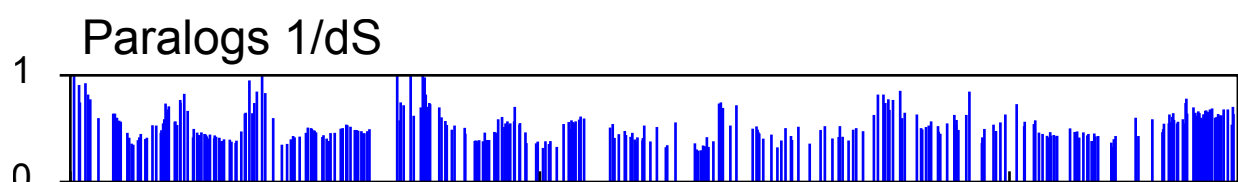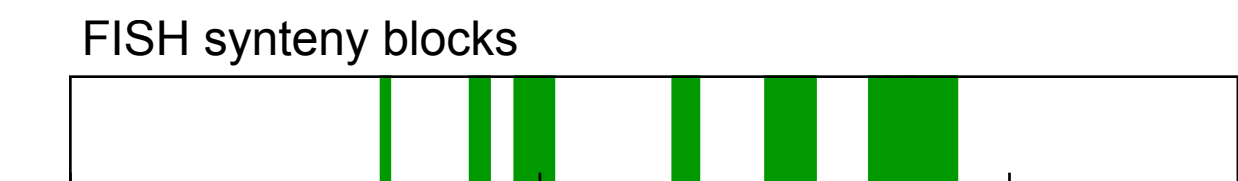

0

1

2

# Telomere and Centromere

location

Chromosome X

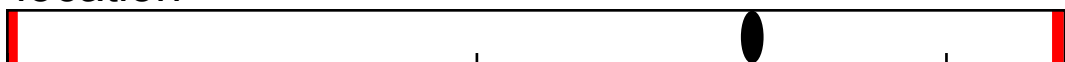

Transposable elements / 50 kb

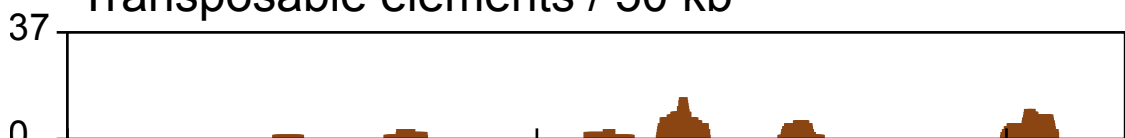

tRNA genes / 50 kb

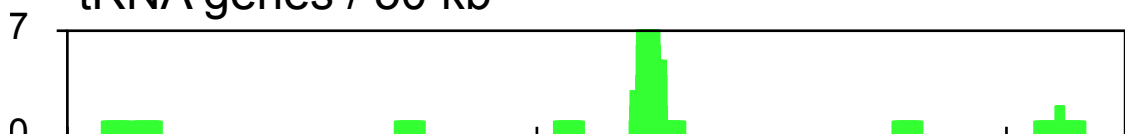

Recombination rate

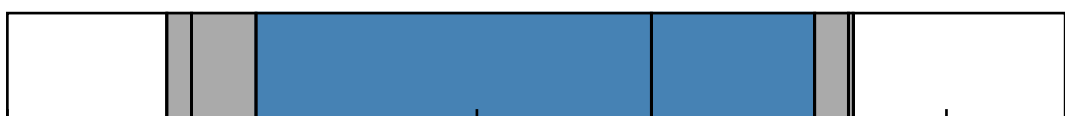

Genes / 50 kb

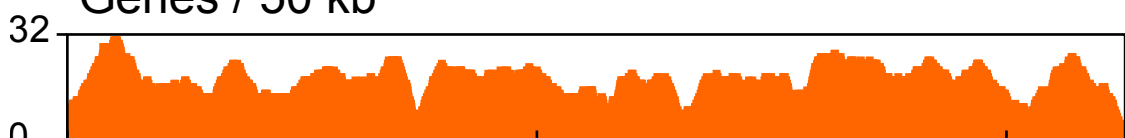

Orphan genes / genes / 50 kb

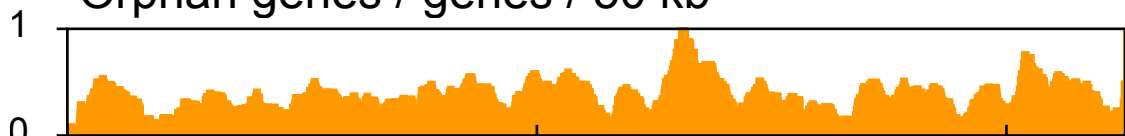

Orthologous genes / genes / 50 kb

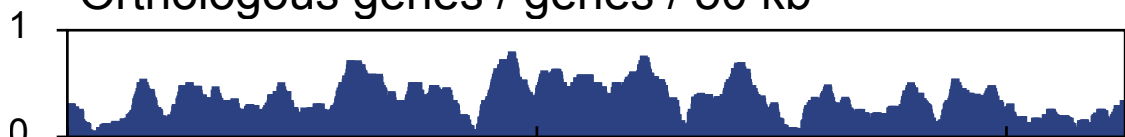

Paralogous genes / genes / 50 kb

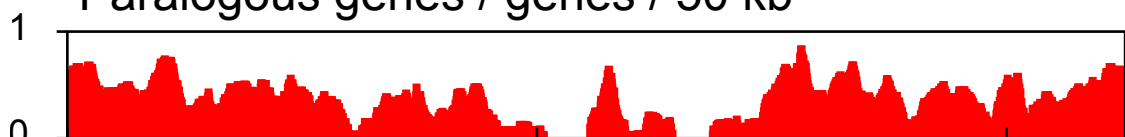

Paralogs 1/dS

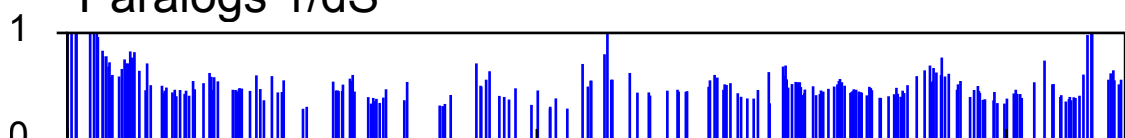

FISH synteny blocks

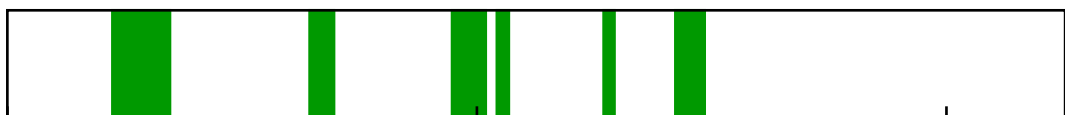

0

1

2

# Telomere and Centromere

location

Chromosome XI

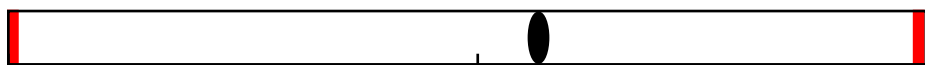

Transposable elements / 50 kb

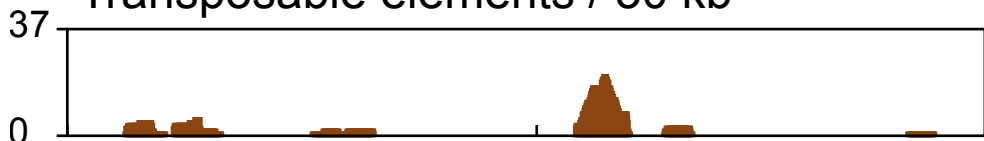

tRNA genes / 50 kb

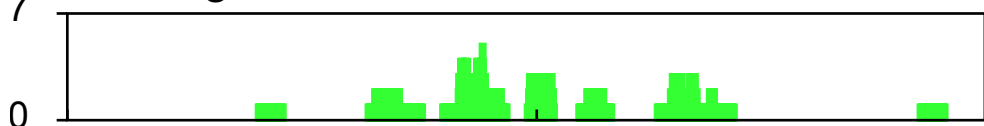

Recombination rate

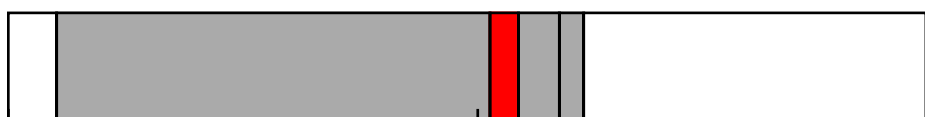

Genes / 50 kb

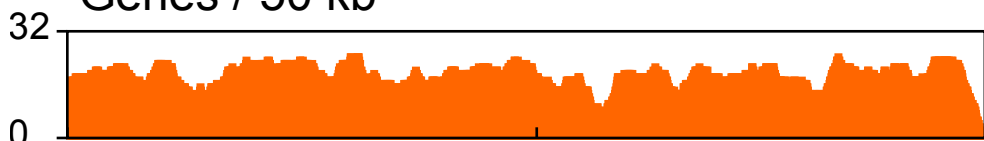

Orphan genes / genes / 50 kb

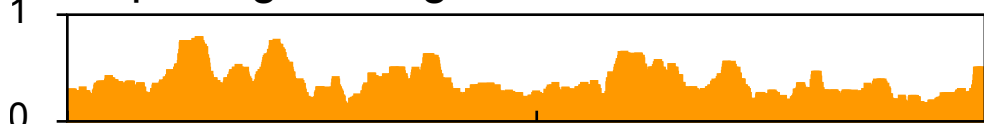

Orthologous genes / genes / 50 kb

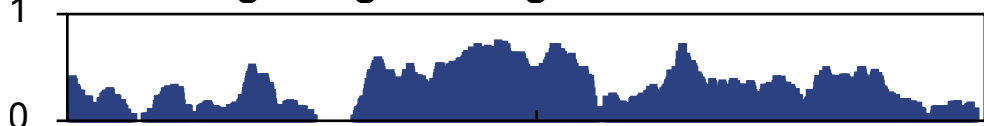

Paralogous genes / genes / 50 kb

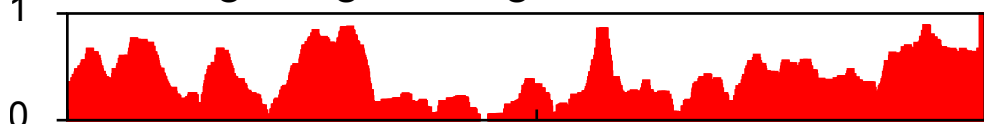

Paralogs 1/dS

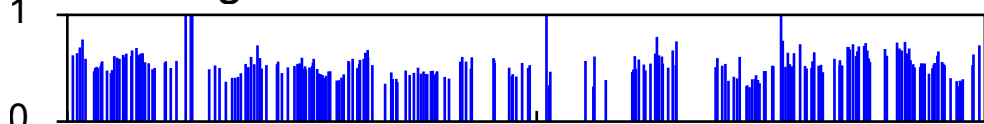

FISH synteny blocks

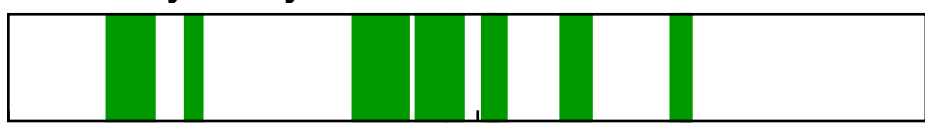

0

1

# Telomere and Centromere

location

Chromosome XII

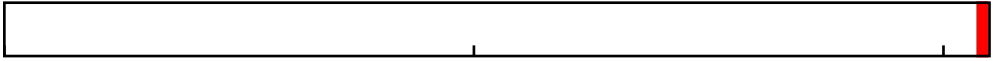

37 Transposable elements / 50 kb

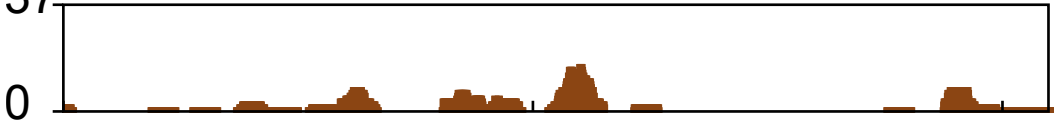

7 tRNA genes / 50 kb

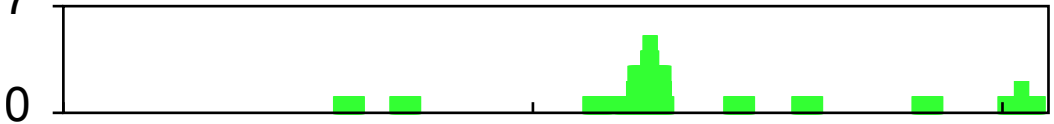

Recombination rate

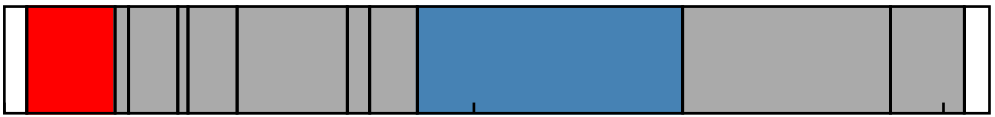

32 Genes / 50 kb

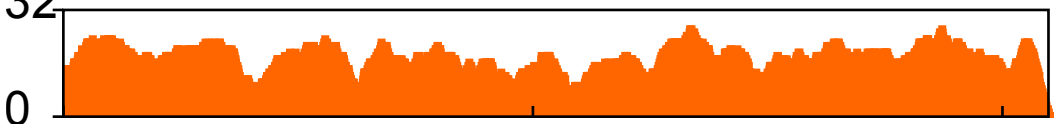

1 Orphan genes / genes / 50 kb

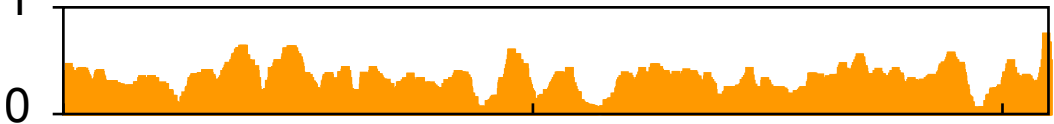

1 Orthologous genes / genes / 50 kb

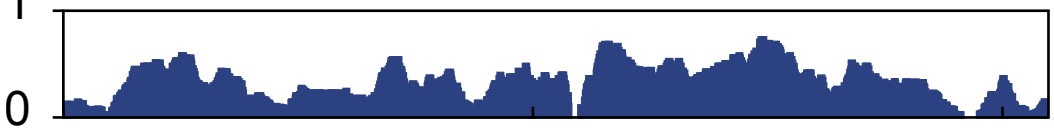

1 Paralogous genes / genes / 50 kb

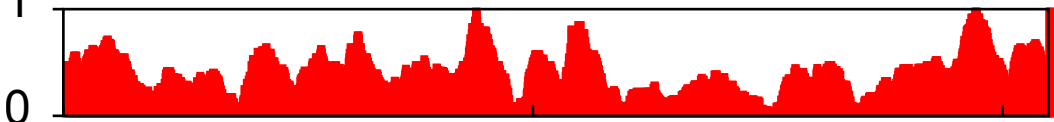

1 Paralogs 1/dS

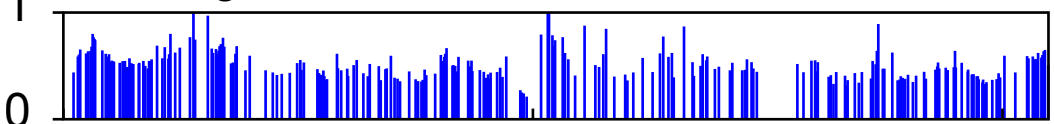

FISH synteny blocks

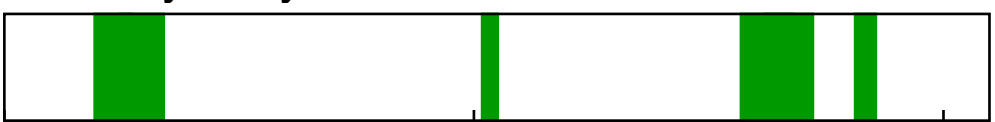

0 1 2

# Chromosome XIII

Telomere and Centromere location

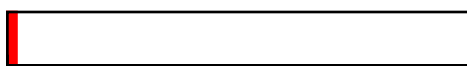

Transposable elements / 50 kb

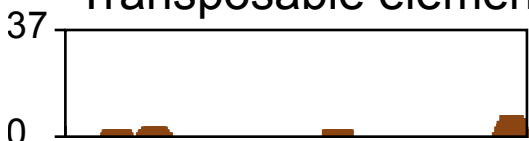

tRNA genes / 50 kb

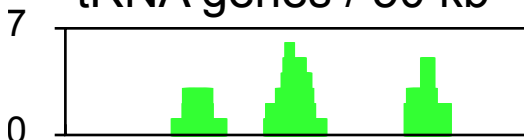

Recombination rate

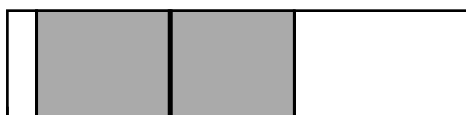

Genes / 50 kb

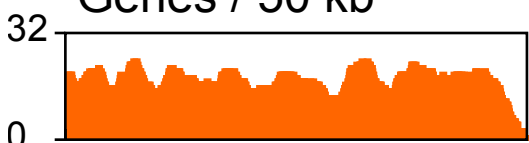

Orphan genes / genes / 50 kb

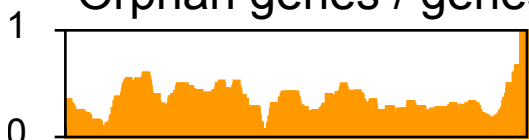

Orthologous genes / genes / 50 kb

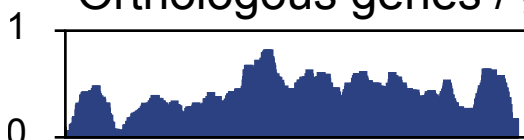

Paralogous genes / genes / 50 kb

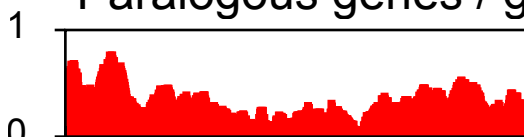

Paralogs 1/dS

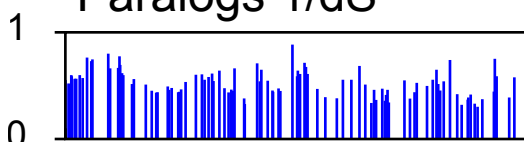

FISH synteny blocks

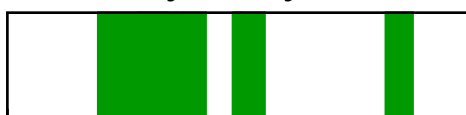

0
