# Supplementary material
Source: PubMed Central journal article supplement (PMC2900686)
Supplement: 1003391107_sfig04.pdf [file 1003391107_sfig04.pdf]

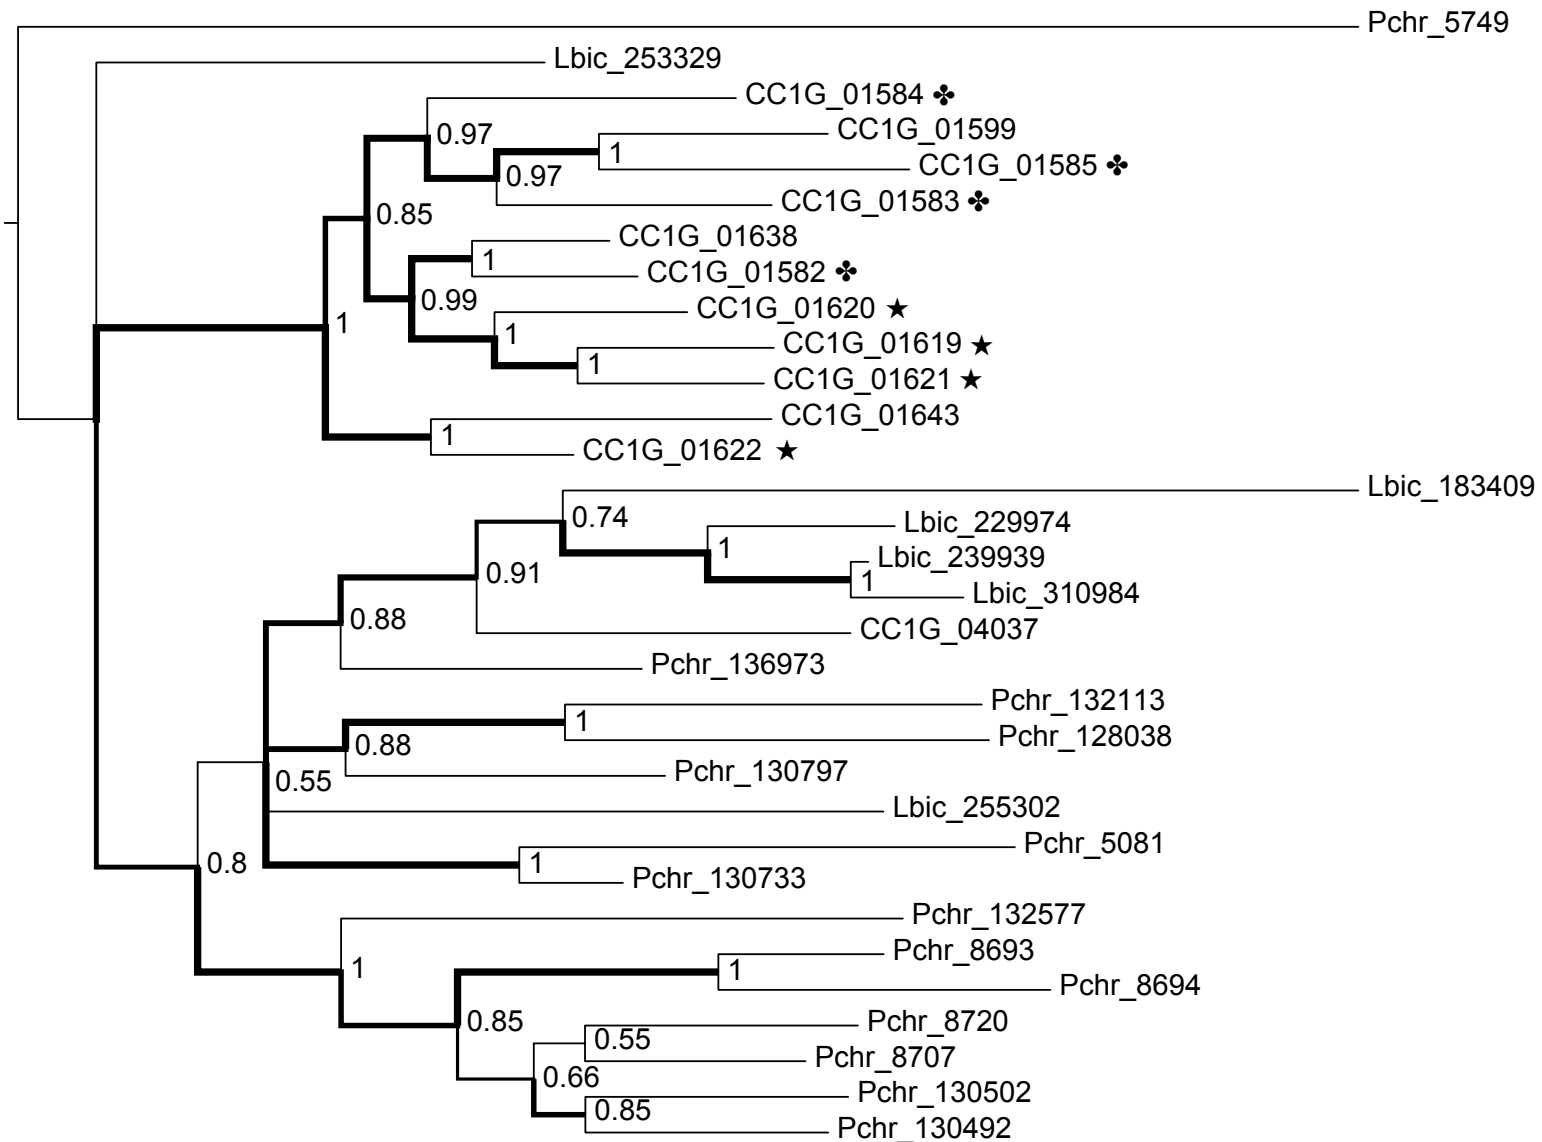

Pchr\_5749

Lbic\_253329

CC1G\_01584 ♣

CC1G\_01599

CC1G\_01585 ♣

CC1G\_01583 ♣

CC1G\_01638

CC1G\_01582 ♣

CC1G\_01620 ★

CC1G\_01619 ★

CC1G\_01621 ★

CC1G\_01643

CC1G\_01622 ★

Lbic\_183409

Lbic\_229974

Lbic\_239939

Lbic\_310984

CC1G\_04037

Pchr\_136973

Pchr\_132113

Pchr\_128038

Pchr\_130797

Lbic\_255302

Pchr\_5081

Pchr\_130733

Pchr\_132577

Pchr\_8693

Pchr\_8694

Pchr\_8720

Pchr\_8707

Pchr\_130502

Pchr\_130492

0.2
