# Supplementary material
Source: PubMed Central journal article supplement (PMC2900686)

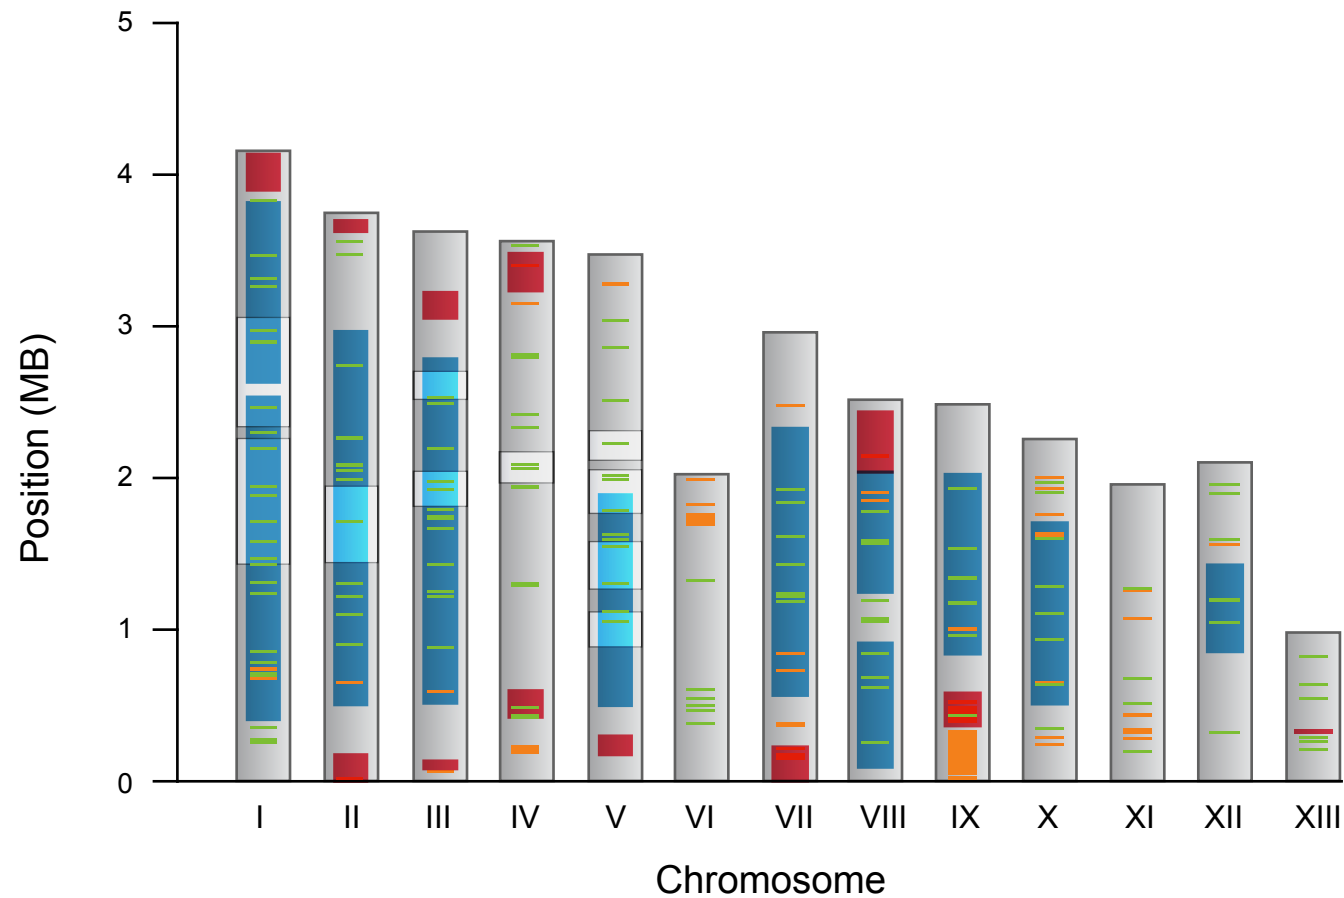

Supplement: 1003391107_sfig02.pdf [file 1003391107_sfig02.pdf]

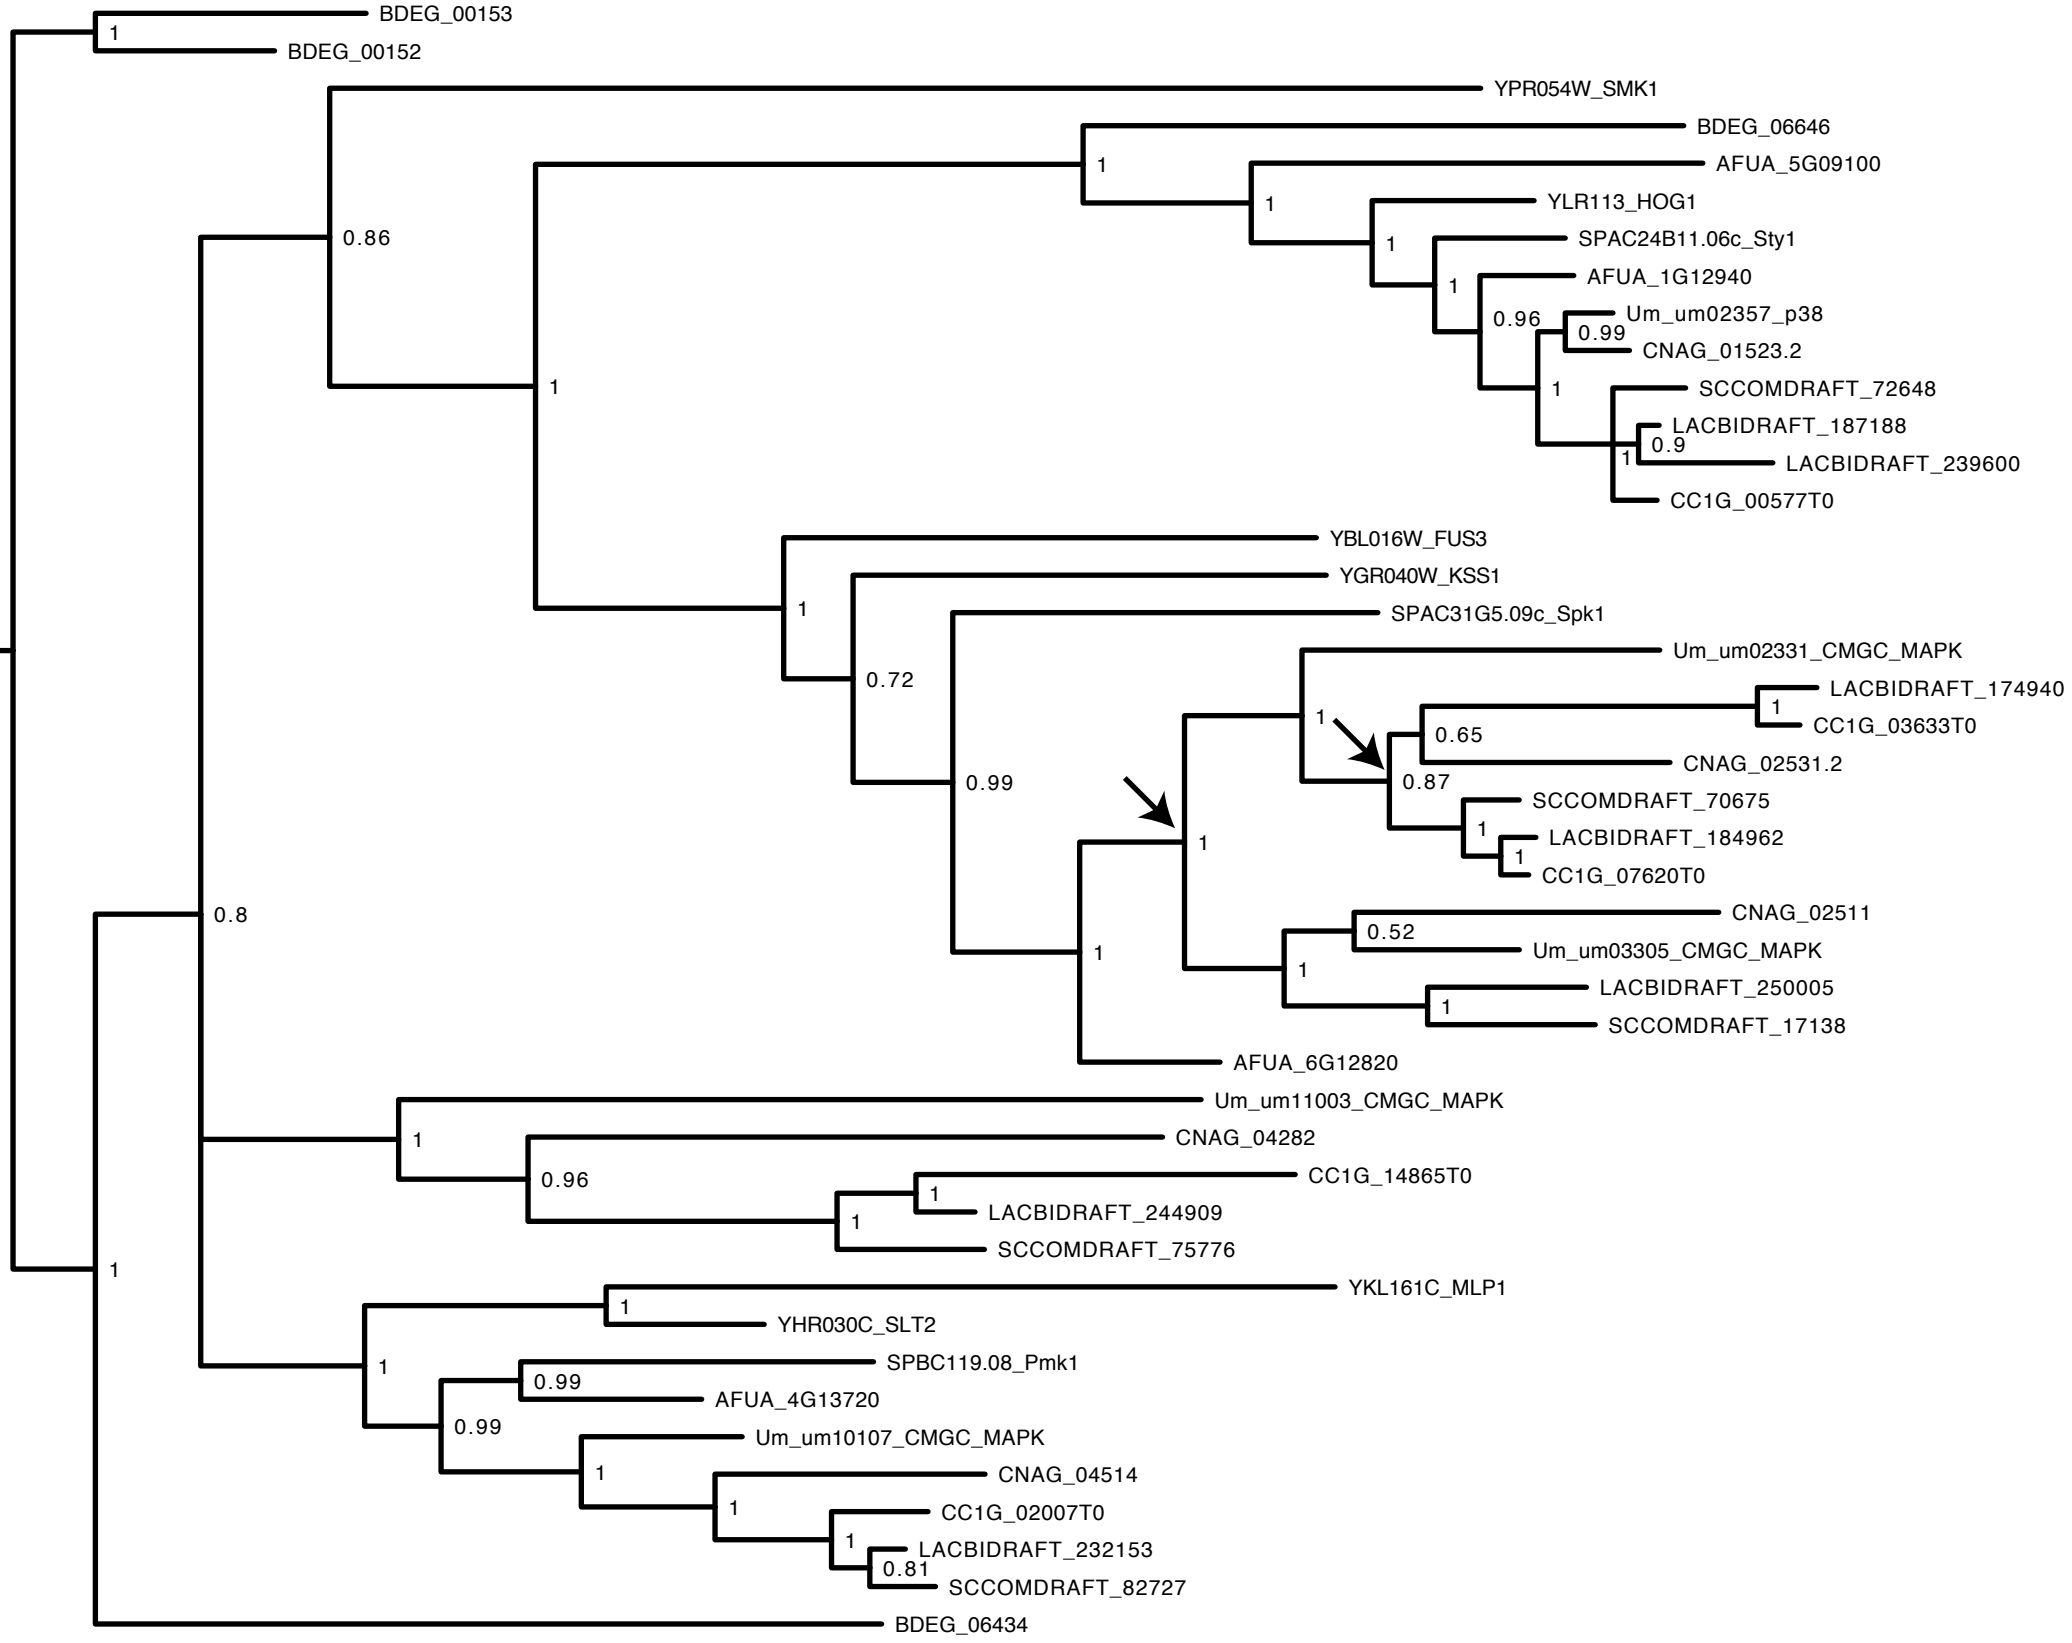

0.2

Supplement: 1003391107_sfig03.pdf [file 1003391107_sfig03.pdf]

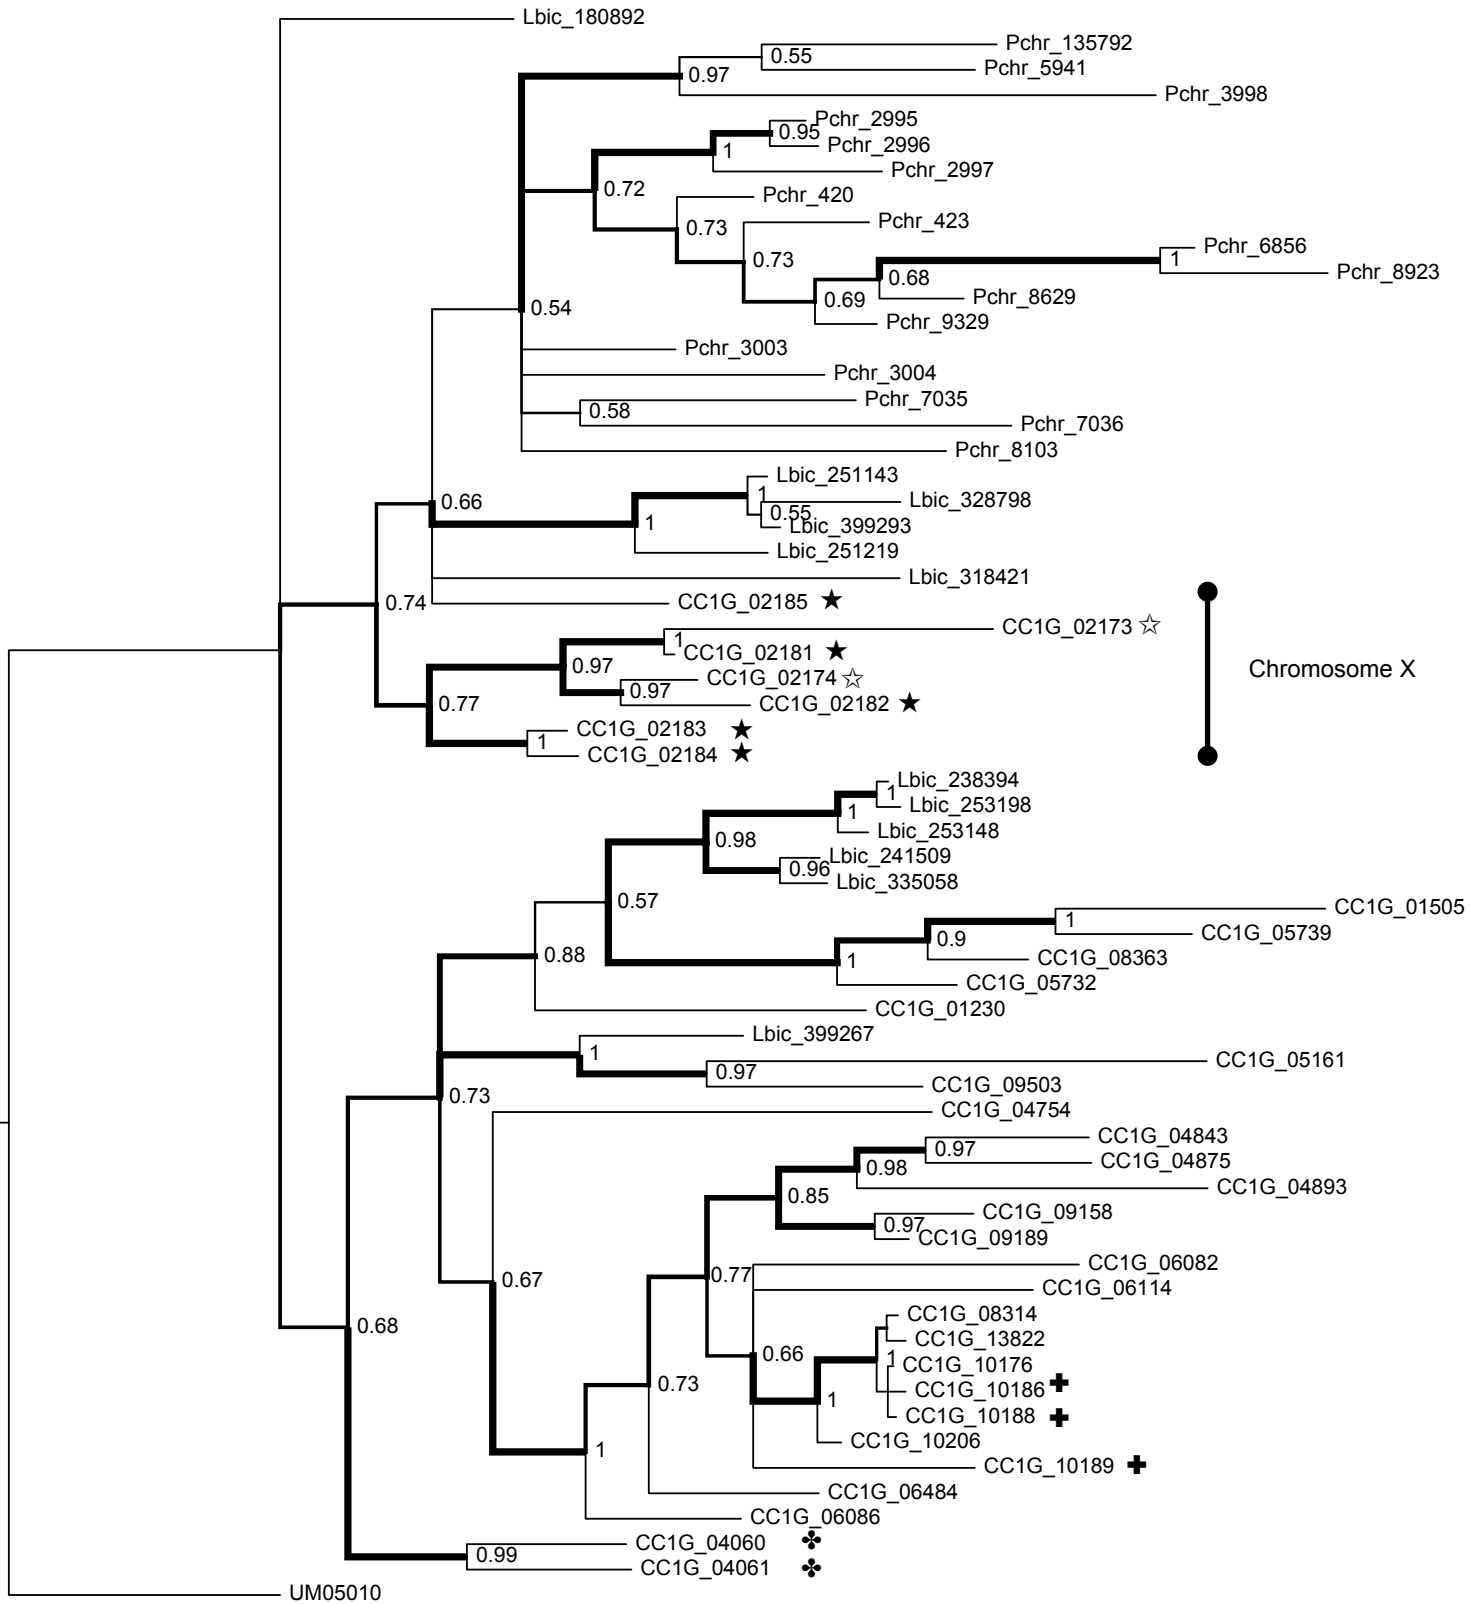

0.2

Supplement: 1003391107_sfig05.pdf [file 1003391107_sfig05.pdf]

**A**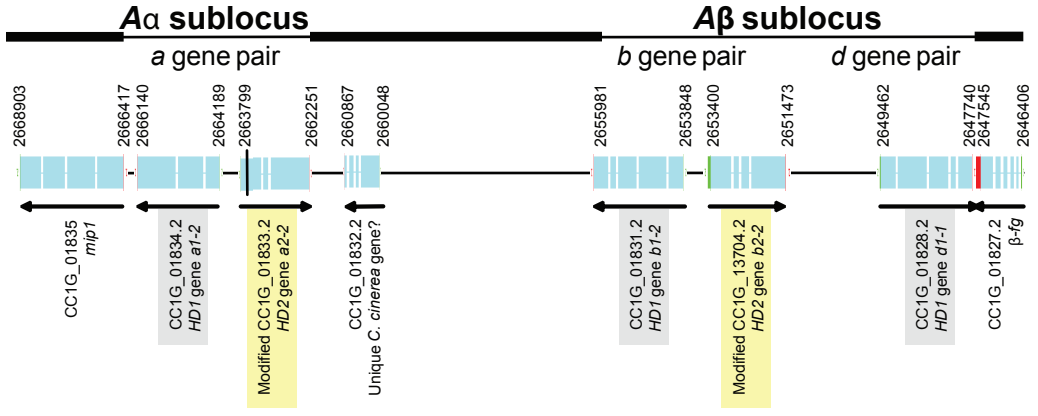**B**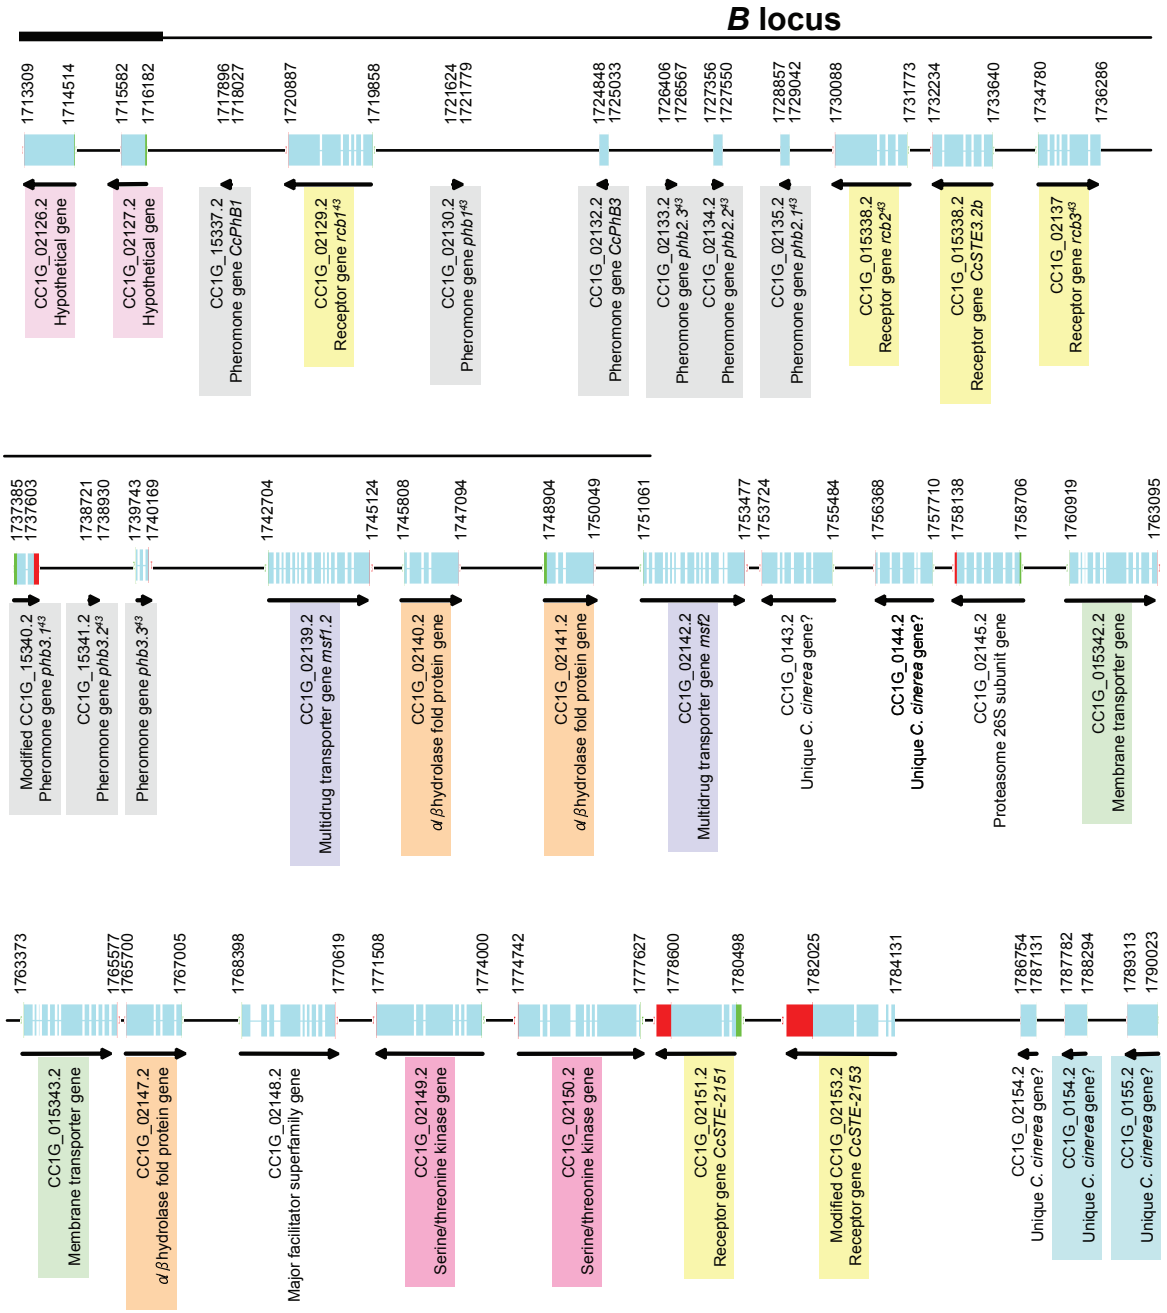

Supplement: 1003391107_sfig06.pdf [file 1003391107_sfig06.pdf]
